# Supplementary material for: Enantioselective synthesis of polyhydroxyindolizidinone and quinolizidinone derivatives from a common precursor
Source: publisher site journal article supplement (doi:10.3762/bjoc.10.327), 2014-12-22
Supplement: Additional file 1 [file 1860-5397-10-327-S1.pdf]

## Supporting Information

for

# Enantioselective synthesis of polyhydroxyindolizidinone and quinolizidinone derivatives from a common precursor

Nemai Saha and Shital K. Chattopadhyay\*

Address: Department of Chemistry, University of Kalyani, Kalyani - 741235, West Bengal,  
India, Fax: +91+33+25828282

Email: Shital K. Chattopadhyay - skchatto@yahoo.com

\*Corresponding author

### Experimental details and analytical data of all new compounds as well as their $^1\text{H}$ and $^{13}\text{C}$ NMR spectra

| Content                                                                      | pages   |
|------------------------------------------------------------------------------|---------|
| Experimental procedures and characterization data for all new compounds..... | S2–S15  |
| Copies of NMR spectral data for all new compounds .....                      | S16–S38 |

## Experimental procedures and characterization data for all new compounds

Column chromatography was performed on silica gel, Merck grade (230-400 mesh). TLC plates were visualized with vaniline solution, in an iodine chamber or with UV, unless noted otherwise. Melting points were recorded in open capillaries and are uncorrected. Optical rotations were measured on a Rudolph Autopol-IV polarimeter purchased from a DST grant and IR spectra were recorded on a Perkin-Elmer Spectrum-1 instrument using KBr disks, chloroform solution or as neat.  $^1\text{H}$  NMR and  $^{13}\text{C}$  NMR spectra were recorded on a Bruker Avance 400 and 600, operating at 400, 600 MHz for  $^1\text{H}$  and 100 and 150 MHz for  $^{13}\text{C}$  NMR, respectively purchased from a DST-FIST grant. HRMS were performed in a JEOL-JNM mass spectrometer obtained from a paid source. Dichloromethane was distilled over calcium hydride under an inert atmosphere. THF, toluene, benzene and ether were freshly distilled under argon from a purple solution of sodium and benzophenone ketyl. Unless stated otherwise, all reagents were purchased from commercial sources and used without additional purification.

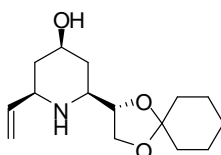

### (2*S*,4*R*,6*R*)-2-((*S*)-1,4-Dioxaspiro[4.5]decan-2-yl)-6-vinylpiperidin-4-ol (**7**).

A solution of oxazabicyclic **6** (200 mg, 0.75 mmol) in acetic acid/water (v/v 80:20, 2.0 mL) was treated with activated zinc powder (245 mg, 3.75 mmol) portion wise at room temperature for 1 h. Water (2 mL) was then added, and the mixture was filtered. The filter cake was washed with water (5 mL) and the combined aqueous solution was neutralized with solid  $\text{NaHCO}_3$ . The aqueous mixture was then repeatedly extracted with EtOAc (3 $\times$ 10 mL) and the combined organic phase was washed with water (1 $\times$ 10 mL), brine solution (1 $\times$ 10 mL), and then dried over  $\text{MgSO}_4$ . The dried solution was then filtered, and the filtrate was concentrated under reduced pressure to leave a crude product which was purified by column chromatography over neutral alumina using ethyl acetate-hexane mixture (1:1) to give the piperidinol **7** as a colorless liquid (177 mg, 86%).  $[\alpha]_D +6.9$  ( $c$  0.85,  $\text{CHCl}_3$ ); IR ( $\text{CHCl}_3$ ): 3392, 2936, 2858, 1645, 1449, 1367, 1281, 1163, 1100, 1040, 928  $\text{cm}^{-1}$ ;  $^1\text{H}$  NMR ( $\text{CDCl}_3$ , 400 MHz):  $\delta$  = 5.84 (ddd,  $J$  = 6.4, 10.4, 16.8 Hz, 1 H), 5.18 (dd,  $J$  = 1.2, 16.8 Hz, 1 H), 5.05 (dd,  $J$  = 0.8, 10.0 Hz, 1 H), 4.09-4.04 (m, 1 H), 3.96 (d,  $J$  = 6.4 Hz, 2 H), 3.73 (dq,  $J$  = 4.4, 10.8 Hz, 1 H), 3.17-3.13 (m, 1 H), 2.90-2.86 (m, 1 H), 2.05-1.97 (m, 2 H), 1.77 (brm, 2 H),

1.62-1.58 (m, 8 H), 1.41-1.32 (m, 2 H), 1.17 (dd,  $J = 11.6, 22.8$  Hz, 1 H), 1.00 (dd,  $J = 11.6, 22.8$  Hz, 1 H).  $^{13}\text{C}$  NMR ( $\text{CDCl}_3$ , 100 MHz):  $\delta = 140.4, 114.6, 109.5, 78.0, 69.0, 64.9, 57.2, 55.4, 41.5, 36.9, 36.0, 34.7, 25.1, 24.0, 23.8$ ; HRMS (QTOF ES+) found  $m/z$  268.1906 ( $\text{M}+\text{H}^+$ );  $\text{C}_{15}\text{H}_{26}\text{NO}_3$  requires 268.1913.

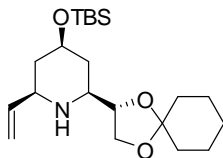

**(2*S*,4*R*,6*R*)-4-(*tert*-Butyldimethylsilyloxy)-2-((*S*)-1,4-dioxaspiro[4.5]decan-2-yl)-6-vinylpiperidine (8).**

DIEA (145 mg, 190  $\mu\text{L}$ , 1.12 mmol) followed by TBS-OTf (295 mg, 260  $\mu\text{L}$ , 1.12 mmol) was added drop wise to a stirred solution of the aminol **7** (200 mg, 0.75 mmol) in dry  $\text{CH}_2\text{Cl}_2$  (5 mL) at  $-5$   $^\circ\text{C}$ . The resulting mixture was stirred for 1 h at the same temperature before being quenched with dry methanol (1 mL). The reaction mixture was then diluted with  $\text{CH}_2\text{Cl}_2$  (25 mL) and the combined organic solution was successively washed with water (1 $\times$ 25 mL), brine solution (1 $\times$ 25 mL) and then dried over  $\text{MgSO}_4$ . The dried solution was then filtered and the filtrate was concentrated in *vacuo* to leave a crude product, which was purified by flash chromatography over silica gel using 5% ethyl acetate in hexane to give the silyl ether **8** (260 mg, 91%) as a colorless oil.  $[\alpha]_{\text{D}} +5.9$  ( $c$  0.48,  $\text{CHCl}_3$ ). IR ( $\text{CHCl}_3$ ): 3436, 2936, 2857, 1645, 1463, 1448, 1362, 1252, 1163, 1099, 926, 837, 775  $\text{cm}^{-1}$ .  $^1\text{H}$  NMR ( $\text{CDCl}_3$ , 400 MHz):  $\delta = 5.76$  (ddd,  $J = 6.8, 10.4, 17.2$  Hz, 1 H), 5.10 (dd,  $J = 0.8, 17.2$  Hz, 1 H), 4.95 (dd,  $J = 0.8, 10.8$  Hz, 1 H), 4.00-3.86 (m, 3 H), 3.60 (sep,  $J = 4.4$  Hz, 1 H), 3.06-3.02 (m, 1 H), 2.83-2.79 (m, 1 H), 1.80-1.73 (m, 2 H), 1.55-1.51 (m, 10 H), 1.35-1.31 (m, 1 H), 1.14 (dd,  $J = 11.6, 23.2$  Hz, 1 H), 0.94 (dd,  $J = 11.6, 23.2$  Hz, 1 H), 0.82 (s, 9 H), -0.01 (s, 6 H).  $^{13}\text{C}$  NMR ( $\text{CDCl}_3$ , 100 MHz):  $\delta = 140.9, 114.1, 109.2, 78.2, 69.8, 64.8, 57.2, 55.1, 42.2, 37.6, 36.0, 34.8, 25.8, 25.2, 23.9, 23.8, 18.1, -4.6$ ; HRMS (QTOF ES+) found  $m/z$  382.2774 ( $\text{M}+\text{H}^+$ );  $\text{C}_{21}\text{H}_{40}\text{NO}_3\text{Si}$  requires 382.2777.

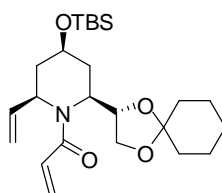

**1-((2*S*,4*R*,6*R*)-4-(*tert*-Butyldimethylsilyloxy)-2-((*S*)-1,4-dioxaspiro[4.5]decan-2-yl)-6-vinylpiperidin-1-yl)prop-2-en-1-one (**9**).**

EDC (200 mg, 1.05 mmol), acrylic acid (58 mg, 55  $\mu$ L, 0.8 mmol), *N*-methylmorpholine (55  $\mu$ L, 0.53 mmol) and HOBt (70 mg, 0.53 mmol) were sequentially added to a stirred solution of the amine **8** (200 mg, 0.53 mmol) in dry  $\text{CH}_2\text{Cl}_2$  (5 mL) at 0  $^\circ\text{C}$ . The reaction mixture was then allowed to come to room temperature and stirred for 6 h. The reaction mixture was then extracted with  $\text{CH}_2\text{Cl}_2$  (2 $\times$ 25 mL) and the combined extract was washed sequentially with 1 (N) HCl (1 $\times$ 20 mL), saturated aqueous  $\text{NaHCO}_3$  solution (1 $\times$ 20 mL), water (1 $\times$ 20 mL) and brine (1 $\times$ 20 mL). The resulting solution was then dried over anhydrous  $\text{MgSO}_4$ , filtered, and the filtrate was concentrated in *vacuo* to leave a crude product which was purified by flash chromatography over silica gel using 1:8 ethyl acetate-hexane solution to give the amide **9** as a colourless oil (220 mg, 96%).  $[\alpha]_{\text{D}} - 4.3$  (*c* 0.86,  $\text{CHCl}_3$ ); IR ( $\text{CHCl}_3$ ): 2935, 2858, 1649, 1613, 1420, 1366, 1254, 1163, 1101, 1067, 928, 910, 837, 776  $\text{cm}^{-1}$ ;  $^1\text{H}$  NMR ( $\text{CDCl}_3$ , 400 MHz):  $\delta$  = 6.60-6.47 (m, 1 H), 6.24-6.07 (m, 2 H), 5.64-5.60 (m, 1 H), 5.34-4.84 (m, 3 H), 4.51-4.43 (m, 1 H), 3.97-3.62 (m, 4 H), 2.11 (br m, 1 H), 1.82-1.80 (m, 2 H), 1.65-1.45 (m, 9 H), 1.30-1.18 (m, 2 H), 0.81 (s, 9 H), -0.001 (s, 3 H), -0.02 (s, 3 H);  $^1\text{H}$  NMR ( $\text{DMSO-}d_6$ , 400 MHz, 70  $^\circ\text{C}$ ):  $\delta$  = 6.71-6.62 (m, 1 H), 6.05 (br d,  $J$  = 16.4 Hz, 2 H), 5.63 (d,  $J$  = 10.0 Hz, 1 H), 5.00-4.97 (m, 2 H), 4.71-4.48 (m, 3 H), 4.03 (br s, 1 H), 3.71 (dd,  $J$  = 6.4, 8.0 Hz, 1 H), 3.65 (br m, 1 H), 2.0-1.92 (m, 1 H), 1.82-1.58 (m, 3 H), 1.48-1.36 (m, 8 H), 1.28-1.16 (m, 2 H), 0.80 (s, 9 H), -0.04 (s, 3 H), -0.05 (s, 3 H).  $^{13}\text{C}$  NMR ( $\text{CDCl}_3$ , 100 MHz):  $\delta$  = 167.5 (166.6), 140.7 (139.9), 128.9 (128.1), 116.9 (115.1), 109.8, 67.2, 65.8, 65.0, 54.3, 49.6 (48.8), 37.4, 36.4, 35.5, 34.6, 32.3, 31.3, 25.8, 25.2, 24.0, 23.9, 18.1, -4.9, -5.1.  $^{13}\text{C}$  NMR ( $\text{DMSO-}d_6$ , 100 MHz, 70  $^\circ\text{C}$ ):  $\delta$  = 166.4, 141.1, 129.2, 127.7, 114.8, 108.8, 76.7, 66.2, 64.6, 52.6, 48.8, 38.8, 36.4, 34.7, 31.1, 25.6, 24.6 (two signals), 23.7, 17.6, -5.2. HRMS (QTOF ES+) found  $m/z$  436.2875 ( $\text{M}+\text{H}$ ) $^+$ ;  $\text{C}_{24}\text{H}_{42}\text{NO}_4\text{Si}$  requires 436.2883.

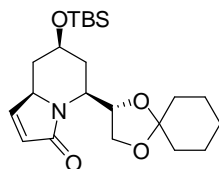

**(5*S*,7*R*,8*aR*)-7-(*tert*-Butyldimethylsilyloxy)-5-((*S*)-1,4-dioxaspiro[4.5]decan-2-yl)-6,7,8,8*a*-tetrahydroindolizin-3(5*H*)-one (10).**

Grubbs' 2<sup>nd</sup> generation catalyst (31 mg, 8 mol %) was added to a stirred solution of the diene **9** (200 mg, 0.46 mmol) in dry degassed benzene (15 ml) under argon atmosphere and the homogeneous mixture was heated to reflux for 24 h. The reaction mixture was allowed to come to room temperature and then concentrated in *vacuo* to leave a crude product which on chromatography over silica gel using ethyl acetate–petroleum ether (2:8) provided the product **10** as a colorless solid (140 mg, 75%). Mp: 118-120 °C;  $[\alpha]_D -12.3$  (*c* 0.89, CHCl<sub>3</sub>); IR (CHCl<sub>3</sub>): 2931, 2858, 1672, 1471, 1450, 1417, 1390, 1291, 1164, 1121, 1085, 935, 843, 775 cm<sup>-1</sup>; <sup>1</sup>H NMR (CDCl<sub>3</sub>, 400 MHz):  $\delta$  = 6.99 (dd, *J* = 1.2, 5.6 Hz, 1 H), 6.0 (d, *J* = 5.6 Hz, 1 H), 5.05 (ddd, *J* = 2.8, 6.0, 9.6 Hz, 1 H), 4.34 (dd, *J* = 6.0, 9.6 Hz, 1 H), 4.01 (dd, *J* = 3.2, 9.6 Hz, 1 H), 3.90-3.85 (m, 2 H), 3.21-3.16 (m, 1 H), 2.39-2.35 (m, 1 H), 2.23-2.20 (m, 1 H), 1.64-1.61 (m, 8 H), 1.42-1.41 (m, 2 H), 1.30 (dd, *J* = 11.6, 23.2 Hz, 1 H), 1.10 (dd, *J* = 11.6, 23.2 Hz, 1 H), 0.91 (s, 9 H), 0.1 (overlapped singlet, 6 H); <sup>13</sup>C NMR (CDCl<sub>3</sub>, 100 MHz):  $\delta$  = 168.7, 146.2, 128.1, 109.7, 74.9, 69.6, 69.0, 61.7, 58.3, 40.2, 39.0, 37.6, 34.2, 25.8, 25.2, 24.2, 23.7, 18.1, -4.6, -4.7. HRMS (QTOF ES+) found *m/z* 430.2391 (M+Na)<sup>+</sup>; C<sub>22</sub>H<sub>37</sub>NNaO<sub>4</sub>Si requires 430.2390.

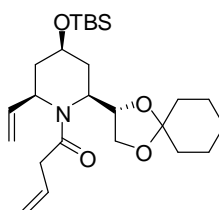

**1-((2*S*,4*R*,6*R*)-4-(*tert*-Butyldimethylsilyloxy)-2-((*S*)-1,4-dioxaspiro[4.5]decan-2-yl)-6-vinylpiperidin-1-yl)but-3-en-1-one (11).**

EDC (300 mg, 1.58 mmol), vinyl acetic acid (86  $\mu$ L, 1.02 mmol), *N*-methylmorpholine and HOBt (106 mg, 0.79 mmol) were sequentially added to a stirred solution of the amine **8** (300 mg, 0.79 mmol) in dry CH<sub>2</sub>Cl<sub>2</sub> (8 mL) at 0 °C. The reaction mixture was allowed to come to room temperature and stirred for 10 h. The resulting mixture was then extracted with CH<sub>2</sub>Cl<sub>2</sub> (2×25 mL) and the combined extract was washed sequentially with 1 (N) HCl (1×20 mL),

saturated aqueous NaHCO<sub>3</sub> solution (1×20 mL), water (1×20 mL) and brine (1×20 mL). The residual solution was then dried over anhydrous MgSO<sub>4</sub>, filtered, and the filtrate was concentrated in *vacuo* to leave a crude product which was purified by flash chromatography over silica gel using 1:9 ethyl acetate-hexane solution to give the amide **11** as colorless oil (318 mg, 90%). [α]<sub>D</sub> -19.1 (*c* 0.83, CHCl<sub>3</sub>); IR (CHCl<sub>3</sub>): 2938, 2856, 1652, 1611, 1422, 1254, 1160, 1101, 910, 834, 776 cm<sup>-1</sup>; <sup>1</sup>H NMR (mixture of rotamers) (CDCl<sub>3</sub>, 400 MHz): δ = 6.14-6.08 (m, 1 H), 5.94-5.86 (m, 1 H), 5.14-4.97 (m, 4 H), 4.81-4.78 (m, 1 H), 4.56-4.52 (m, 1 H), 4.36-4.35 (m, 1 H), 4.04-3.97 (m, 1 H), 3.84-3.63 (m, 2 H), 3.20-3.03 (m, 2 H), 2.12-2.03 (m, 1 H), 1.85-1.75 (m, 2 H), 1.66-1.41 (m, 9 H), 1.31-1.30 (m, 2 H), 0.83 (s, 9 H), 0.06-(-0.06) (m, 6 H); <sup>1</sup>H NMR (DMSO-*d*<sub>6</sub>, 400 MHz, 70 °C): δ = 6.08-6.00 (m, 1 H), 5.89-5.78 (m, 1 H), 5.19-4.96 (m, 4 H), 4.67-4.48 (m, 3 H), 4.01 (d, *J* = 3.2 Hz, 1 H), 3.70 (d, *J* = 7.2 Hz, 1 H), 3.59-3.56 (m, 1 H), 3.05-2.93 (m, 2 H), 1.94 (d, *J* = 11.6 Hz, 1 H), 1.83-1.72 (m, 3 H), 1.46-1.39 (m, 8 H), 1.27-1.18 (m, 2 H), 0.8 (s, 9 H), -0.01 (s, 3 H), -0.02 (s, 3 H). <sup>13</sup>C NMR (CDCl<sub>3</sub>, 100 MHz): δ = 171.3 (170.8), 140.5 (139.9), 131.9 (131.7), 117.6 (117.4), 115.1, 110.2 (109.7), 77.5 (76.6), 67.1, 65.2 (64.9), 54.3 (53.9), 49.5 (48.5), 39.2 (39.1), 37.7 (37.2), 36.3, 35.5, 35.1 (34.7), 32.0 (31.4), 25.8, 25.2 (25.16), 23.94 (23.90), 18.0, -5.0, -5.1. <sup>13</sup>C NMR (DMSO-*d*<sub>6</sub>, 100 MHz, 70 °C): δ = 171.2, 141.4, 133.4, 117.3, 115.4, 109.3, 77.2, 66.7, 65.1, 53.3, 49.1, 38.5, 36.8, 32.3, 35.3, 26.1 (two signals), 25.1, 24.1, 23.9, 18.1, -4.7. HRMS (QTOF ES+) found *m/z* 472.2853 (M + Na)<sup>+</sup>; C<sub>25</sub>H<sub>43</sub>NNaO<sub>4</sub>Si requires 472.2859.

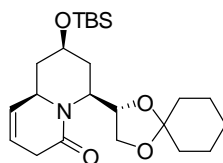

**(2*R*,4*S*,9*aR*)-2-(*tert*-Butyldimethylsilyloxy)-4-((*S*)-1,4-dioxaspiro[4.5]decan-2-yl)-3,4,7,9*a*-tetrahydro-1*H*-quinolizin-6(2*H*)-one (**12**).**

Grubbs' 2<sup>nd</sup> generation catalyst (11 mg, 3 mol%) was added to a stirred solution of the diene **11** (200 mg, 0.45 mmol) in dry degassed benzene (15 mL) under an argon atmosphere and the homogeneous mixture was heated at 50 °C for 2 h. The reaction mixture was allowed to come to room temperature and then concentrated in *vacuo* to leave a crude product which was purified by flash chromatography over silica gel using ethyl acetate-hexane (2:8) to provide the product **12** as a colorless solid (178 mg, 95%). Mp: 136-138 °C; [α]<sub>D</sub> -75.0 (*c* 0.4, CHCl<sub>3</sub>); IR (neat): 2938, 2891, 1642, 1471, 1319, 1162, 1075, 841, 775 cm<sup>-1</sup>; <sup>1</sup>H NMR (CDCl<sub>3</sub>, 400 MHz): δ = 5.66-5.58 (m, 2 H), 5.05 (ddd, *J* = 4.4, 6.4, 10.0 Hz, 1 H), 4.00 (dd, *J*

= 6.4, 8.8 Hz, 1 H), 3.79-3.72 (m, 2 H), 3.66 (d,  $J = 12.0$  Hz, 1 H), 2.81 (d,  $J = 7.6$  Hz, 2 H), 2.72-2.67 (m, 1 H), 2.24 (dd,  $J = 4.0, 12.4$  Hz, 1 H), 1.97 (dd,  $J = 2.4, 12.8$  Hz, 1 H), 1.54-1.41 (m, 9 H), 1.32 (brs, 2 H), 1.20 (dd,  $J = 12.0, 23.6$  Hz, 1 H), 0.81 (s, 9 H), 0.01- (-0.01) (m, 6 H).  $^{13}\text{C}$  NMR ( $\text{CDCl}_3$ , 100 MHz):  $\delta = 167.6, 125.3, 121.9, 109.6, 76.0, 69.5, 67.2, 63.4, 58.4, 43.7, 38.0, 37.4, 34.4, 33.2, 25.7, 25.2, 24.1, 23.7, 18.0, -4.6, -4.7$ . HRMS (QTOF ES+) found  $m/z$  444.2539 ( $\text{M}+\text{Na}$ ) $^+$ ,  $\text{C}_{23}\text{H}_{39}\text{NNaO}_4\text{Si}$  requires 444.2546.

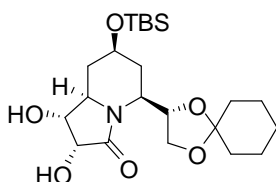

**(1*R*,2*R*,5*S*,7*R*,8*aR*)-7-(*tert*-Butyldimethylsilyloxy)-1,2-dihydroxy-5-((*S*)-1,4-dioxaspiro[4.5]decan-2-yl)hexahydroindolizin-3(5*H*)-one (13).**

NMO (115 mg, 0.98 mmol) was added in one portion to a solution of the olefin **10** (200 mg, 0.49 mmol) in a mixture of acetone / water (4:1) (5 mL) at room temperature, and then a solution of  $\text{OsO}_4$  in water (1 % by wt, 0.7 mL) was added drop wise over 5 minute. The resulting mixture was stirred for 12 h. before being quenched by addition of granular sodium bisulfite (20 mg). The inhomogeneous mixture was then filtered and the filtrate was concentrated in *vacuo* to leave a residue which was extracted with ethyl acetate ( $2 \times 30$  mL). The combined organic part was washed with water ( $2 \times 30$  mL), brine solution ( $1 \times 30$  mL) and then dried over  $\text{MgSO}_4$ . The dried organic solution was then filtered and the filtrate was concentrated under reduced pressure to leave a crude mass which was purified over silica gel using 80 % ethyl acetate-hexane to give a colourless crystalline solid **13** (208 mg, 96 %). Mp: 222-224 °C.  $[\alpha]_D^{25} +9.2$  ( $c$  0.65, MeOH). IR (neat): 3436, 2934, 2859, 1706, 1686, 1671, 1447, 1374, 1254, 1164, 1124, 1093, 837, 770  $\text{cm}^{-1}$ .  $^1\text{H}$  NMR ( $\text{CDCl}_3$ , 400 MHz):  $\delta = 4.81$  (ddd,  $J = 3.2, 6.0, 9.6$  Hz, 1 H), 4.31 (br m, 1 H), 4.16 (dd,  $J = 7.0, 9.6$  Hz, 2 H), 4.01 (d,  $J = 5.2$  Hz, 1 H), 3.9 (dd,  $J = 3.2, 9.2$  Hz, 1 H), 3.74-3.67 (m, 1 H), 3.26 (dd,  $J = 2.4, 13.2$  Hz, 1 H), 2.99 (s, 1 H), 2.95-2.89 (m, 1 H), 2.23 (br d,  $J = 12.4$  Hz, 1 H), 1.97 (br d,  $J = 12.0$  Hz, 1 H), 1.62-1.50 (m, 8 H), 1.33 (brm, 2 H), 1.21-1.03 (m, 2 H), 0.80 (s, 9 H), -0.01 (s, 6 H).  $^{13}\text{C}$  NMR ( $\text{CDCl}_3$ , 100 MHz):  $\delta = 171.2, 110.0, 74.7, 70.7, 69.3, 69.1, 68.3, 62.9, 59.0, 38.9, 38.4, 37.5, 34.3, 25.7, 25.2, 24.1, 23.7, 18.0, -4.67, -4.7$ . HRMS (QTOF ES+) found  $m/z$  464.2445 ( $\text{M} + \text{Na}$ ) $^+$ ;  $\text{C}_{22}\text{H}_{39}\text{NNaO}_6\text{Si}$  requires 464.2444.

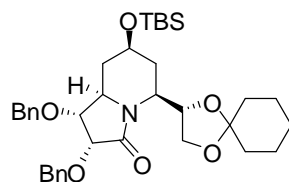

**(1*R*,2*R*,5*S*,7*S*,8*aR*)-1,2-Bis(benzyloxy)-7-(*tert*-butyldimethylsilyloxy)-5-((*S*)-1,4-dioxaspiro[4.5]decan-2-yl)hexahydroindolizin-3(*5H*)-one (14).**

A solution of the diol **13** (100 mg, 0.23 mmol) in anhydrous THF (2 mL) was added drop wise to a stirred suspension of sodium hydride (28.0 mg, 0.64 mmol) in THF (3 mL) at 0 °C under nitrogen atmosphere. The reaction mixture was then allowed to come to room temperature and stirred for 10 minutes. The resulting solution was cooled back to 0 °C and benzyl bromide (110  $\mu$ L, 0.92 mmol) followed by *n*-tetrabutylammonium iodide (cat. 4 mg) were sequentially added. The reaction mixture was stirred for 6 h at room temperature, quenched with saturated NH<sub>4</sub>Cl solution (2 ml) at 0 °C, and then extracted with ethyl acetate (2  $\times$  20 mL). The combined organic layer was washed sequentially with water (1  $\times$  20 mL), brine (1  $\times$  20 mL), dried over anhydrous Na<sub>2</sub>SO<sub>4</sub> and then filtered. The filtrate was concentrated under reduced pressure to leave a crude mass which was purified by column chromatography over silica gel using ethyl acetate in petroleum ether (1:9) to provide the compound **14** (98 mg, 70 %) as a colorless oil.  $[\alpha]_D^{25} + 26.1$  (*c* 0.88, CHCl<sub>3</sub>); IR (CHCl<sub>3</sub>): 2931, 2856, 1701, 1450, 1254, 1123, 1112, 837, 776 cm<sup>-1</sup>; <sup>1</sup>H NMR (CDCl<sub>3</sub>, 400 MHz):  $\delta$  = 7.31-7.19 (m, 10 H), 4.95 (ddd, *J* = 3.2, 6.0, 9.6 Hz, 1 H), 4.90 (d, *J* = 12.0 Hz, 1 H), 4.79 (d, *J* = 12.0 Hz, 1 H), 4.69 (d, *J* = 12 Hz, 1 H), 4.55 (d, *J* = 12.0 Hz, 1 H), 4.28 (dd, *J* = 6.0, 9.6 Hz, 1 H), 4.04 (dd, *J* = 3.2, 9.6 Hz, 1 H), 3.96 (d, *J* = 5.6 Hz, 1 H), 3.75 (dd, *J* = 2.4, 6.0 Hz, 1 H), 3.72-3.68 (m, 1 H), 3.37-3.34 (m, 1 H), 3.00-2.94 (m, 1 H), 2.28-2.24 (m, 1 H), 1.99-1.95 (m, 1 H), 1.66-1.57 (m, 8 H), 1.42-1.33 (m, 2 H), 1.22 (dd, *J* = 12.0, 24.0 Hz, 1 H), 1.05 (dd, *J* = 12.4, 23.2 Hz, 1 H), 0.88 (s, 9 H), 0.08-0.05 (m, 6 H); <sup>13</sup>C NMR (CDCl<sub>3</sub>, 100 MHz):  $\delta$  = 169.5, 137.5, 137.4, 128.6, 128.5, 128.4, 128.2, 128.0, 127.0, 109.8, 76.3, 75.6, 74.8, 72.5, 72.2, 69.0, 68.6, 60.5, 58.9, 39.3, 38.3, 37.5, 34.2, 25.8, 25.2, 24.1, 23.7, 18.1, -4.6, -4.7. HRMS (QTOF ES+) found *m/z* 644.3394 (M + Na)<sup>+</sup>, C<sub>36</sub>H<sub>51</sub>NNaO<sub>6</sub>Si requires 644.3383.



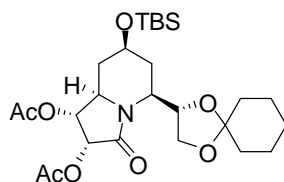

**(1R,2R,5S,7S,8aR)-7-(tert-Butyldimethylsilyloxy)-3-oxo-5-((S)-1,4-dioxaspiro[4.5]decan-2-yl)octahydroindolizine-1,2-diyl diacetate (15).**

Acetic anhydride (120 mg, 1.15 mmol) was added to a stirred solution of the diol **13** (100 mg, 0.23 mmol) in anhydrous pyridine (2 mL) and the resulting reaction mixture was stirred for 12 h at room temperature. The reaction mixture was then diluted with ethyl acetate (1 × 50 mL) and the organic extract was washed sequentially with HCl (1 N, 10 mL), water (1 × 20 mL) followed by brine solution (1 × 20 mL). The organic part was then dried over anhydrous Na<sub>2</sub>SO<sub>4</sub>, filtered and the filtrate was concentrated under reduced pressure to leave a crude mass which was purified over silica gel using ethyl acetate/petroleum ether (2:9) to provide the compound **15** (95 mg, 80 %) as a colorless solid.  $[\alpha]_D -7.6$  (*c* 0.42, CHCl<sub>3</sub>); <sup>1</sup>H NMR (CDCl<sub>3</sub>, 400 MHz):  $\delta$  = 5.42 (d, *J* = 6.0 Hz, 1 H), 5.23 (d, *J* = 6.0 Hz, 1 H), 4.96 (ddd, *J* = 2.8, 6.4, 9.6 Hz, 1 H), 4.28 (dd, *J* = 6.0, 9.2 Hz, 1 H), 4.06 (dd, *J* = 2.8, 9.2 Hz, 1 H), 3.78 (ddd, *J* = 4.4, 10.4, 15.2 Hz, 1 H), 3.36 (dd, *J* = 2.8, 13.2 Hz, 1 H), 3.00 (dt, *J* = 2.4, 10.8 Hz, 1 H), 2.35-2.31 (m, 1 H), 2.22-2.18 (m, 1 H), 2.15 (s, 3 H), 2.11 (s, 3 H), 1.64-1.58 (m, 8 H), 1.47-1.42 (m, 2 H), 1.35-1.30 (m, 2 H), 0.96 (s, 9 H), 0.01 (s, 6 H); <sup>13</sup>C NMR (CDCl<sub>3</sub>, 100 MHz):  $\delta$  = 170.0 (s), 169.6 (s), 166.3 (s), 110.1 (s), 74.7 (d), 70.0 (d), 69.1 (d), 68.8 (d), 68.2 (t), 60.8 (d), 59.1 (d), 38.6 (t), 38.2 (t), 37.6 (t), 34.2 (t), 25.7 (q), 25.1 (t), 24.1 (t), 23.7 (t), 20.6 (q), 20.3 (q), 18.0 (s), -4.6 (q), -4.7 (q); HRMS (QTOF ES+) found *m/z* 548.2661 (M + Na)<sup>+</sup>, C<sub>26</sub>H<sub>43</sub>NNaO<sub>8</sub>Si requires 548.2656.

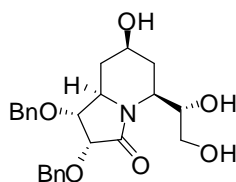

**(1R,2R,5S,7S,8aR)-1,2-bis(benzyloxy)-5-((S)-1,2-dihydroxyethyl)-7-hydroxyhexahydroindolizine-3(5H)-one (16).**

HCl (10 %, 2 mL) was added drop wise to a stirred solution of the acetal derivative **14** (60 mg, 0.09 mmol) in THF (2 mL) at 0 °C. The resulting mixture was allowed to come to room temperature and stirred for 18 h. The homogeneous solution was then diluted with water (2

mL) and neutralized with solid NaHCO<sub>3</sub> before being extracted with ethyl acetate (2 × 10 mL). The combined organic extract was washed successively with water (1 × 5 mL), brine solution (1 × 5 mL), dried over MgSO<sub>4</sub> and then filtered. The filtrate was concentrated in *vacuo* to leave a crude viscous liquid which was purified by flash chromatography over silica gel using 20 % methanol in ethyl acetate to provide **16** (36 mg, 89 %) as a colorless gum. [ $\alpha$ ]<sub>D</sub> +5.1 (*c* 0.88, CHCl<sub>3</sub>); IR (CHCl<sub>3</sub>): 3438, 2935, 2862, 1706, 1684, 1671, 1374, 1258, 1161, 1124, 774 cm<sup>-1</sup>; <sup>1</sup>H NMR (CDCl<sub>3</sub>, 400 MHz):  $\delta$  = 7.41-7.11 (m, 10 H), 5.00 (brs, 1 H), 4.92 (d, *J* = 12.0 Hz, 1 H), 4.77 (d, *J* = 12.0 Hz, 1 H), 4.66 (d, *J* = 12.0 Hz, 1 H), 4.51 (d, *J* = 12.0 Hz, 1 H), 4.44 (brs, 1 H), 4.04 (d, *J* = 5.6 Hz, 1 H), 3.82 (brm, 1 H), 3.73 (dd, *J* = 2.8, 5.2 Hz, 1 H), 3.70-3.66 (m, 1 H), 3.59 (brm, 1 H), 3.50-3.47 (m, 1 H), 3.26 (d, *J* = 11.2 Hz, 1 H), 2.83 (brs, 1 H), 2.60 (brs, 1 H), 2.20-2.17 (m, 1 H), 1.97-1.93 (m, 1 H), 1.50 (dd, *J* = 11.2, 22.8 Hz, 1 H), 1.04 (dd, *J* = 12.0, 23.2 Hz, 1 H); <sup>13</sup>C NMR (CDCl<sub>3</sub>, 100 MHz):  $\delta$  = 170.6, 137.3, 128.54, 128.5, 128.2, 128.1, 128.0, 127.7, 76.4, 75.9, 72.7, 72.2, 69.7, 67.5, 62.8, 61.1, 57.7, 33.7, 29.7. HRMS (QTOF ES+) found *m/z* 450.1892 (M + Na)<sup>+</sup>; C<sub>24</sub>H<sub>29</sub>NNaO<sub>6</sub> requires 450.1893.

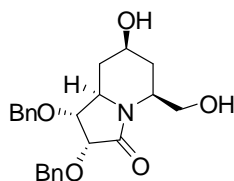

**(1*R*,2*R*,5*S*,7*S*,8*aR*)-1,2-Bis(benzyloxy)-7-hydroxy-5-(hydroxymethyl)hexahydroindolizin-3(5*H*)-one (17).**

NaIO<sub>4</sub> (80 mg, 0.38 mmol) was added portion wise over 5 min to a solution of the diol **16** (80 mg, 0.19 mmol) in acetonitrile /water (v/v 3:1) (3 mL) at 5-10 °C and the resulting mixture was stirred for 30 min. The reaction mixture was allowed to come to room temperature and then filtered. The filtrate was diluted with dichloromethane (20 mL) and the combined organic solution was washed sequentially with water (1 × 10 mL), brine solution (1 × 10 mL) and then dried over MgSO<sub>4</sub>. The organic part was filtered and the filtrate was concentrated in *vacuo* to leave the crude product which was used as such in the next step. The crude aldehyde, thus obtained, was dissolved in dry methanol (2 mL) and cooled to 0 °C. NaBH<sub>4</sub> (10 mg, 0.28 mmol) was then added in one portion and the resulting reaction mixture was allowed to come to room temperature over 30 min while stirring. The reaction mixture was then concentrated and the residue was extracted with ethyl acetate (2 × 10 mL). The combined organic extract was washed with water (5 mL), brine solution (5 mL), and dried

over MgSO<sub>4</sub>. The organic part was then filtered and the filtrate was concentrated in *vacuo* to leave a crude product which was purified over silica gel using 50 % ethyl acetate-hexane solution to give the product **17** as a viscous liquid (68 mg, 92 % over two steps). [ $\alpha$ ]<sub>D</sub> +70.1 (*c* 1.5, CHCl<sub>3</sub>); IR (CHCl<sub>3</sub>): 3432, 2941, 2859, 1709, 1680, 1371, 1164, 1114, 1094, 774 cm<sup>-1</sup>; <sup>1</sup>H NMR (CDCl<sub>3</sub>, 400 MHz):  $\delta$  = 7.42-7.27 (m, 10 H), 5.02 (br s, 1 H), 4.93 (d, *J* = 11.6 Hz, 1 H), 4.77 (d, *J* = 11.6 Hz, 1 H), 4.65 (d, *J* = 11.6 Hz, 1 H), 4.44 (d, *J* = 11.6 Hz, 1 H), 3.98 (d, *J* = 6.0 Hz, 1 H), 3.90-3.74 (m, 4 H), 3.68 (t, *J* = 5.6 Hz, 1 H), 3.50 (ddd, *J* = 3.2, 4.8, 8.0 Hz, 1 H), 3.23 (ddd, *J* = 2.8, 6.4, 9.2 Hz, 1 H), 2.28-2.24 (m, 1 H), 1.86-1.80 (m, 1 H), 1.02 (dd, *J* = 12.0, 23.2 Hz, 1 H), 0.89-0.84 (m, 1 H); <sup>13</sup>C NMR (CDCl<sub>3</sub>, 100 MHz):  $\delta$  = 170.7, 137.2, 137.16, 128.56, 128.50, 128.4, 128.15, 128.09, 128.0, 75.0, 72.4, 72.1, 67.4, 63.1, 60.7, 58.1, 38.8, 36.9, 29.7. HRMS (QTOF ES+) found *m/z* 420.1790 (M + Na)<sup>+</sup>; C<sub>23</sub>H<sub>27</sub>NNaO<sub>5</sub> requires 420.1787.

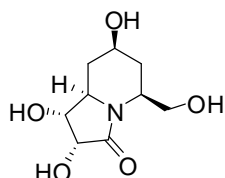

**(1R,2R,5S,7S,8aR)-1,2,7-Trihydroxy-5-(hydroxymethyl)hexahydroindolizin-3(5H)-one (18).**

Pd(OH)<sub>2</sub>-C (10%, 4 mg) was added to a solution of the benzyl ether **17** (25 mg, 0.06 mmol) in methanol (2 mL) and the resulting heterogeneous mixture was vigorously stirred under hydrogen atmosphere for 3 h. The reaction mixture was then filtered through celite, the filter cake was washed with methanol (10 mL), and the combined filtrate was concentrated in *vacuo* to leave a crude product which was purified by chromatography over neutral alumina using Meoh/EtOAc (1:4) to obtain the tetrahydroxyindolizidine derivative **18** (11 mg, 81%) as a colourless foam. [ $\alpha$ ]<sub>D</sub> +2.1 (*c* 0.47, MeOH); <sup>1</sup>H NMR (DMSO-*d*<sub>6</sub>, 400 MHz):  $\delta$  = 5.49 (br s, 1 H), 5.02 (s, 1 H), 4.91-4.88 (m, 1 H), 4.06 (s, 1 H), 3.79 (brm, 3 H), 3.64 (m, 1 H), 3.21-3.07 (m, 3 H), 1.99 (d, *J* = 10.4 Hz, 1 H), 1.79 (d, *J* = 10.8 Hz, 1 H), 1.09-0.96 (m, 2 H). <sup>13</sup>C NMR (DMSO-*d*<sub>6</sub>, 100 MHz):  $\delta$  = 172.5, 71.2, 70.1, 67.0, 63.1, 62.2, 57.7, 38.4, 37.7; HRMS (QTOF ES+) found *m/z* 240.0849 (M+Na)<sup>+</sup>; C<sub>9</sub>H<sub>15</sub>NNaO<sub>5</sub> requires 240.0848.

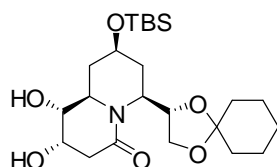

**(1*R*,2*S*,6*S*,8*R*,9*aR*)-8-(*tert*-Butyldimethylsilyloxy)-1,2-dihydroxy-6-((*S*)-1,4-dioxaspiro[4.5]decan-2-yl)hexahydro-1*H*-quinolizin-4(6*H*)-one (19).**

In a one-necked round bottomed flask equipped with a magnetic stirring bar, olefin **12** (200 mg, 0.49 mmol) was taken in acetone / water (4:1) (5 mL) at room temperature. Solid *N*-methylmorpholine-*N*-oxide (115 mg, 0.98 mmol) followed by an aqueous solution of OsO<sub>4</sub> (1% by w/v, 0.4 mL) were then sequentially added to the reaction mixture which was stirred for 6 h before being quenched with granular sodium bisulfite (200 mg). The reaction mixture was then filtered, the filtrate was concentrated in *vacuo*, and the resulting residue was diluted with ethyl acetate (2 × 30 mL). The combined organic part was washed sequentially with water (2×20 mL) and brine solution (1×20 mL), and then dried over MgSO<sub>4</sub>. The organic extract was then filtered and the filtrate was concentrated under reduced pressure to leave a crude product which was purified by column chromatography over silica gel using 80 % ethyl acetate-hexane to give compound **19** as a colourless crystalline solid (205 mg, 95 %). Mp: 208 °C; [α]<sub>D</sub> +5.1 (*c* 0.6, MeOH); IR (neat): 3466, 3350, 2887, 2859, 1649, 1619, 1123, 1084, 838, 776 cm<sup>-1</sup>; <sup>1</sup>H NMR (CDCl<sub>3</sub>, 400 MHz): δ = 4.91 (ddd, *J* = 4.4, 6.0, 10.0 Hz, 1 H), 4.04-4.02 (br m, 1 H), 3.94 (dd, *J* = 6.0, 8.0 Hz, 1 H), 3.81-3.72 (m, 3 H), 3.29-3.26 (m, 1 H), 3.11 (d, *J* = 3.2 Hz, 1 H), 3.00 (d, *J* = 5.2 Hz, 1 H), 2.80 (t, *J* = 9.2 Hz, 1 H), 2.54 (dd, *J* = 9.6 Hz, 16.4 Hz, 1 H), 2.42 (dd, *J* = 5.6, 16.4 Hz, 1 H), 2.18 (dd, *J* = 4.4, 12.4 Hz, 1 H), 1.97 (dd, *J* = 4.8, 12.4 Hz, 1 H), 1.52-1.39 (m, 9 H), 1.37-1.30 (m, 2 H), 1.23-1.14 (m, 1 H), 0.8 (s, 9 H), -0.001 (s, 3 H), -0.01 (s, 3 H); <sup>13</sup>C NMR (CDCl<sub>3</sub>, 100 MHz): δ = 168.1 (s), 109.8 (s), 76.1 (d), 70.9 (d), 69.0 (d), 67.0 (t), 65.0 (d), 62.3 (d), 60.4 (d), 40.5 (t), 37.6 (t), 37.4 (t), 37.3 (t), 34.4 (t), 25.7 (q), 25.2 (t), 24.1 (t), 23.7 (t), 18.0 (t), -4.6 (q), -4.7 (q). HRMS (QTOF ES+) found *m/z* 478.2612 (M + Na)<sup>+</sup> C<sub>23</sub>H<sub>41</sub>NNaO<sub>6</sub>Si requires 478.2601.

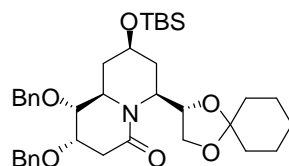

**(1*R*,2*S*,6*S*,8*S*,9*aR*)-1,2-Bis(benzyloxy)-8-(*tert*-butyldimethylsilyloxy)-6-((*S*)-1,4-dioxaspiro[4.5]decan-2-yl)hexahydro-1*H*-quinolizin-4(6*H*)-one (20).**

Compound **20** was prepared following the procedure described for **14** Yield: 114 mg, 82 %.  $[\alpha]_D + 71.0$  (*c* 0.53,  $\text{CHCl}_3$ ); IR ( $\text{CHCl}_3$ ): 2931, 2856, 1701, 1450, 1254, 1123, 1112, 837, 776  $\text{cm}^{-1}$ ;  $^1\text{H}$  NMR ( $\text{CDCl}_3$ , 400 MHz):  $\delta = 7.31$ -7.23 (m, 10 H), 4.96 (ddd,  $J = 4.4, 6.0, 10.0$  Hz, 1 H), 4.72 (d,  $J = 12.0$  Hz, 1 H), 4.54-4.5 (m, 2 H), 4.46 (d,  $J = 12.0$  Hz, 1 H), 3.99 (dd,  $J = 6.4, 8.8$  Hz, 1 H), 3.82 (ddd,  $J = 2.4, 4.8, 7.2$  Hz, 1 H), 3.75 (dd,  $J = 4.4, 9.2$  Hz, 1 H), 3.70 (dd,  $J = 5.2, 10.0$  Hz, 1 H), 3.53 (m, 1 H), 3.29-3.26 (m, 1 H), 2.80-2.68 (m, 2 H), 2.41 (dd,  $J = 4.8, 16.4$  Hz, 1 H), 2.19 (dd,  $J = 4.8, 12.4$  Hz, 1 H), 1.87 (dd,  $J = 4.8, 12.4$  Hz, 1 H), 1.55-1.51 (m, 10 H), 1.42-1.35 (m, 1 H), 1.14-1.05 (m, 1 H), 0.81 (s, 9 H), -0.001 (s, 3 H), -0.01 (s, 3 H);  $^{13}\text{C}$  NMR ( $\text{CDCl}_3$ , 100 MHz):  $\delta = 167.4, 138.1, 137.8, 128.5, 127.9, 127.8, 127.6, 109.5, 76.6, 76.0, 72.3, 71.1, 71.0, 69.2, 67.4, 62.7, 58.9, 41.0, 37.9, 37.2, 35.5, 34.4, 25.8, 25.3, 24.1, 23.8, 18.0, -4.6, -4.7$ . HRMS (QTOF ES+) found  $m/z$  658.3530 ( $\text{M} + \text{Na}$ )<sup>+</sup>,  $\text{C}_{37}\text{H}_{53}\text{NNaO}_6\text{Si}$  requires 658.3540.

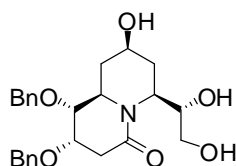

**(1*R*,2*S*,6*S*,8*S*,9*aR*)-1,2-Bis(benzyloxy)-6-((*S*)-1,2-dihydroxyethyl)-8-hydroxyhexahydro-1*H*-quinolizin-4(6*H*)-one (21).**

Compound **21** was prepared following the procedure described for **16** but using 12 h instead of 18 h. Yield: 33 mg, 80%.  $[\alpha]_D + 16.6$  (*c* 1.1,  $\text{CHCl}_3$ ); IR ( $\text{CHCl}_3$ ): 3438, 2933, 2860, 1706, 1679, 1374, 1256, 1167, 1121, 776  $\text{cm}^{-1}$ ;  $^1\text{H}$  NMR ( $\text{CDCl}_3$ , 400 MHz):  $\delta = 7.38$ -7.29 (m, 10 H), 4.65 (d,  $J = 12.0$  Hz, 1 H), 4.64 (d,  $J = 11.6$  Hz, 1 H), 4.56 (d,  $J = 11.6$  Hz, 1 H), 4.48 (d,  $J = 11.6$  Hz, 1 H), 4.11-4.03 (m, 2 H), 3.97 (br s, 1 H), 3.70 (d,  $J = 4.4$  Hz, 1 H), 3.65-3.49 (m, 3 H), 3.47 (dd,  $J = 1.6, 7.2$  Hz, 1 H), 2.84 (dd,  $J = 5.2, 17.2$  Hz, 1 H), 2.55-2.48 (m, 2 H), 2.09-2.03 (m, 1 H), 1.93-1.86 (m, 2 H), 1.42-1.30 (m, 1 H), 0.89-0.83 (m, 2 H);  $^{13}\text{C}$  NMR ( $\text{CDCl}_3$ , 100 MHz):  $\delta = 169.0, 137.8, 137.6, 128.7, 128.6, 128.5, 128.1, 127.9, 127.8, 77.6, 77.3, 72.1, 71.6, 71.3, 69.8, 65.1, 63.3, 37.0, 36.1, 32.1, 29.7$ . HRMS (QTOF ES+) found  $m/z$  464.2046 ( $\text{M} + \text{Na}$ )<sup>+</sup>,  $\text{C}_{25}\text{H}_{31}\text{NNaO}_6$  requires 464.2049.

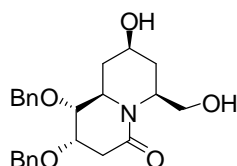

**(1*R*,2*S*,6*S*,8*S*,9*aR*)-1,2-Bis(benzyloxy)-8-hydroxy-6-(hydroxymethyl)hexahydro-1*H*-quinolizin-4(6*H*)-one (22).**

Compound **22** was prepared following the procedure described for **17**. Yield: 67 mg, 90 %.  $[\alpha]_D - 68.0$  (*c* 3.0, CHCl<sub>3</sub>); IR (CHCl<sub>3</sub>): 3468, 3348, 2889, 2859, 1644, 1619, 1123, 1082, 846, 776 cm<sup>-1</sup>. <sup>1</sup>H NMR (CDCl<sub>3</sub>, 400 MHz):  $\delta = 7.38$ -7.28 (m, 10 H), 4.69 (d, *J* = 12.0 Hz, 1 H), 4.64 (d, *J* = 12.0 Hz, 1 H), 4.57 (d, *J* = 12.0 Hz, 1 H), 4.51 (d, *J* = 12.0 Hz, 1 H), 4.03-3.89 (m, 3 H), 3.68 (dd, *J* = 4.8, 12.4 Hz, 1 H), 3.53-3.45 (m, 2 H), 3.41-3.338 (m, 1 H), 2.87 (dd, *J* = 7.2, 17.2 Hz, 1 H), 2.52 (dd, *J* = 4.4, 17.2 Hz, 1 H), 2.36 (dd, *J* = 6.8, 12.4 Hz, 1 H), 2.00 (dt, *J* = 4.0, 14.0 Hz, 2 H), 1.70 (dt, *J* = 8.0, 13.6 Hz, 1 H), 1.37-1.20 (m, 2 H). <sup>13</sup>C NMR (CDCl<sub>3</sub>, 100 MHz):  $\delta = 168.3$ , 137.8, 137.6, 128.5, 128.0, 127.9, 127.7, 72.1, 71.2, 70.0, 66.1, 63.4, 58.9, 56.1, 38.5, 35.8, 35.7, 29.7. HRMS (QTOF ES+) found *m/z* 434.1952 (M + Na)<sup>+</sup>, C<sub>24</sub>H<sub>29</sub>NNaO<sub>5</sub> requires 434.1943.

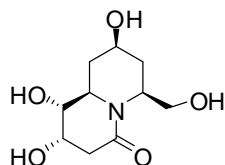

**(1*R*,2*S*,6*S*,8*S*,9*aR*)-1,2,8-Trihydroxy-6-(hydroxymethyl)hexahydro-1*H*-quinolizin-4(6*H*)-one (23).**

Compound **23** was prepared following the procedure described for **18** but using a time of 6 h. Yield: 11 mg, 80 %.  $[\alpha]_D - 31.0$  (*c* 0.95, MeOH). <sup>1</sup>H NMR (DMSO-*d*<sub>6</sub>, 400 MHz):  $\delta = 5.07$  (d, *J* = 5.2 Hz, 1 H), 4.94 (d, *J* = 3.6 Hz, 1 H), 4.91 (d, *J* = 4.0 Hz, 1 H), 4.79 (t, *J* = 6.0 Hz, 1 H), 3.8 (br m, 3 H), 3.72-3.66 (m, 2 H), 3.22 (dd, *J* = 7.6, 12.4 Hz, 1 H), 3.16 (d, *J* = 4.8 Hz, 1 H), 2.39 (dd, *J* = 4.0, 16.8 Hz, 1 H), 2.31 (dd, *J* = 6.4, 16.8 Hz, 1 H), 2.21 (dd, *J* = 6.4, 12.8 Hz, 1 H), 1.98-1.86 (m, 1 H), 1.56-1.51 (m, 1 H), 1.16-1.10 (m, 1 H). <sup>1</sup>H NMR (D<sub>2</sub>O, 600 MHz):  $\delta = 4.20$ -4.18 (m, 1 H), 4.13-4.10 (m, 1 H), 3.92 (dd, *J* = 5.4, 12.0 Hz, 1 H), 3.87 (dd, *J* = 5.4, 12.0 Hz, 1 H), 3.84 (dd, *J* = 1.8, 5.4 Hz, 1 H), 3.56-3.54 (m, 1 H), 3.48 (dd, *J* = 4.2, 12.0 Hz, 1 H), 2.68 (dd, *J* = 4.8, 17.4 Hz, 1 H), 2.59 (dd, *J* = 6.6, 17.4 Hz, 1 H), 2.38 (q, *J* = 6.0 Hz, 1 H), 2.09-2.07 (m, 1 H), 1.68 (dt, *J* = 7.8, 13.8 Hz, 1 H), 1.38 (dd, *J* = 12.0, 22.2 Hz, 1 H). <sup>13</sup>C NMR (DMSO-*d*<sub>6</sub>, 100 MHz):  $\delta = 168.3$ , 71.0, 65.6, 65.4, 63.1, 58.1, 56.9, 38.9, 38.7, 35.1. HRMS (QTOF ES+) found *m/z* 254.1008 (M + Na)<sup>+</sup>, C<sub>10</sub>H<sub>17</sub>NNaO<sub>5</sub> requires 254.1004.

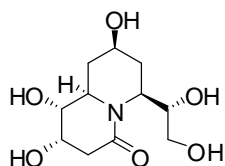

**(1*R*,2*S*,6*S*,8*S*,9*aR*)-6-((*S*)-1,2-Dihydroxyethyl)-1,2,8-trihydroxyhexahydro-1*H*-quinolizin-4(6*H*)-one (24).**

Compound **24** was prepared following the procedure described for **18** but using a time of 6 h. Yield: 25 mg (from 51 mg, 85 %).  $[\alpha]_D - 76.0$  ( $c$  0.6, MeOH).  $^1\text{H NMR}$  ( $\text{D}_2\text{O}$ , 400 MHz):  $\delta = 4.22\text{-}4.18$  (m, 1 H), 4.12-4.09 (m, 1 H), 3.96-3.93 (m, 1 H), 3.78-3.77 (m, 1 H), 3.48 (dd,  $J = 4.8, 12.0$  Hz, 1 H), 3.45-3.40 (m, 2 H), 3.22-3.20 (m, 1 H), 2.53-2.48 (m, 2 H), 2.19 (dd,  $J = 6.0, 12.4$  Hz, 1 H), 2.03-1.99 (m, 1 H), 1.46 (dt,  $J = 9.2, 13.2$  Hz, 1 H), 1.29-1.20 (m, 1 H).  $^{13}\text{C NMR}$  ( $\text{D}_2\text{O}$ , 100 MHz):  $\delta = 170.9, 70.8, 69.7, 66.7, 64.4, 62.8, 59.6, 59.4, 37.7, 36.5, 32.6$ . HRMS (QTOF ES+) found  $m/z$  284.1104 ( $\text{M} + \text{Na}$ ) $^+$ ,  $\text{C}_{11}\text{H}_{19}\text{NNaO}_6$  requires 284.1110.

# Copies of NMR spectral data for all new compounds

NS-6-1

26.12.2012

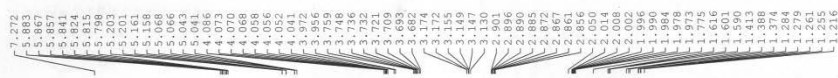

<sup>1</sup>H NMR spectrum of compound 7

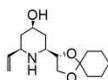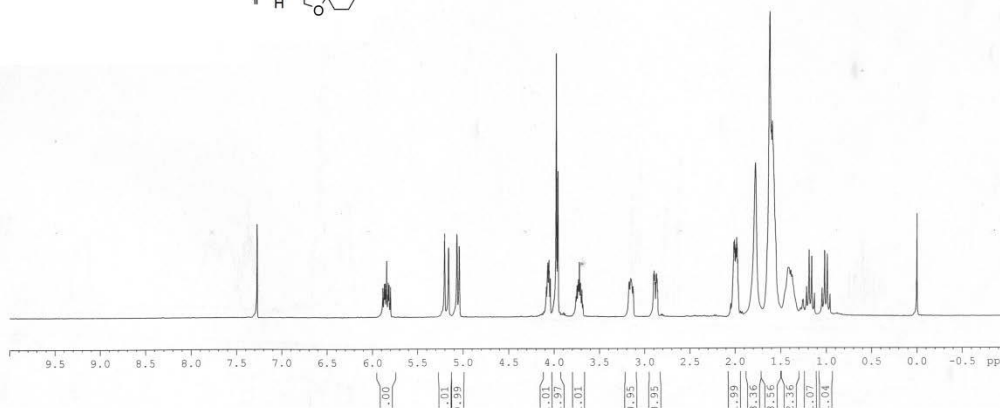

26.12.2012

140.44

114.65

105.48

78.00

77.40

76.76

68.96

64.93

57.20

55.38

41.52

36.93

33.76

34.75

25.12

23.96

23.78

<sup>13</sup>C NMR spectrum of compound 7

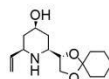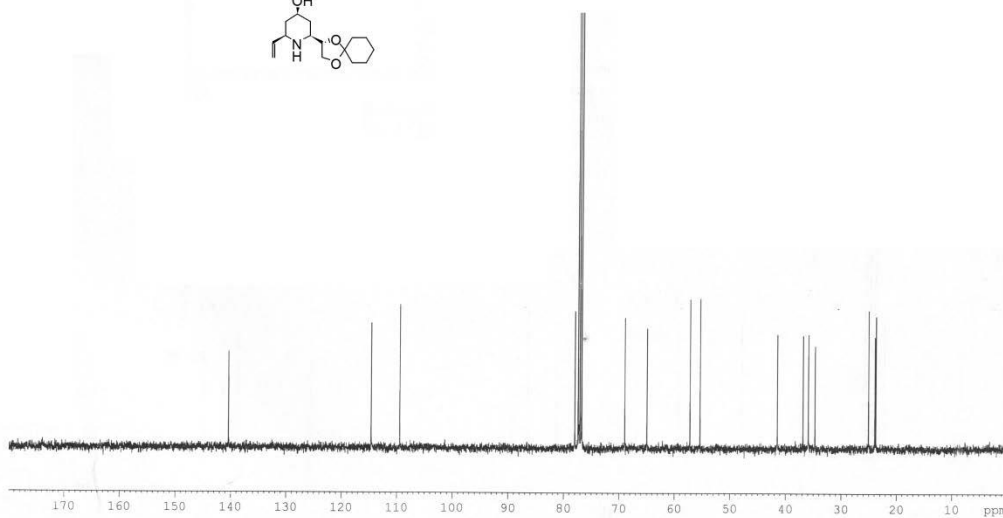



NS-6-2

03.8.2012

7.201  
5.803  
5.786  
5.760  
5.743  
5.734  
5.720  
5.118  
5.077  
4.973  
4.971  
4.946  
4.946  
3.982  
3.972  
3.965  
3.943  
3.922  
3.905  
3.893  
3.857  
3.857  
3.636  
3.624  
3.598  
3.586  
3.571  
3.548  
3.048  
3.042  
3.022  
2.828  
2.819  
2.804  
2.795  
1.802  
1.796  
1.785  
1.785  
1.771  
1.765  
1.740  
1.740  
1.538  
1.536  
1.506  
1.352  
1.318  
1.184  
1.155  
1.127  
0.986  
0.973  
0.957

<sup>1</sup>H NMR spectrum of compound 8

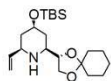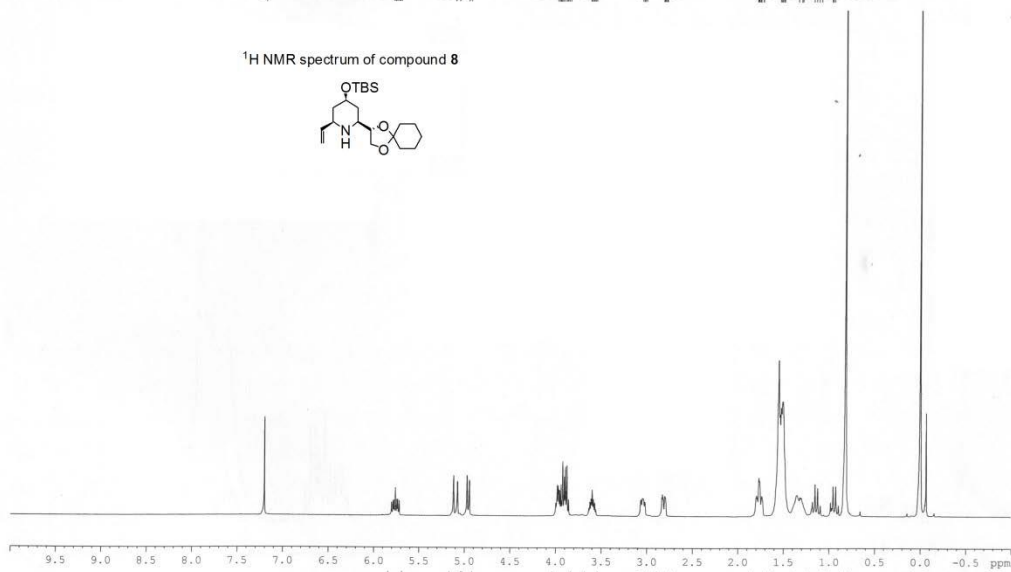

NS-Zn-TBS

11.11.2013

140.95  
114.45  
109.20  
78.19  
77.40  
77.09  
76.77  
68.62  
68.48  
57.25  
55.09  
42.16  
37.67  
35.96  
34.85  
25.82  
25.06  
23.70  
23.77  
18.07  
-4.57

<sup>13</sup>C NMR spectrum of compound 8

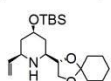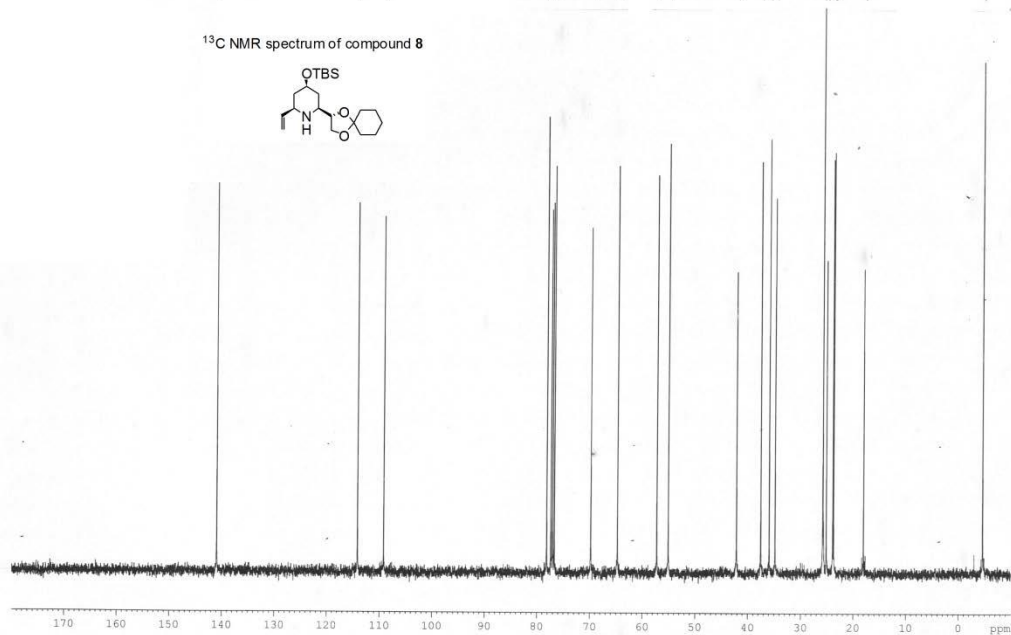

NS-6/3

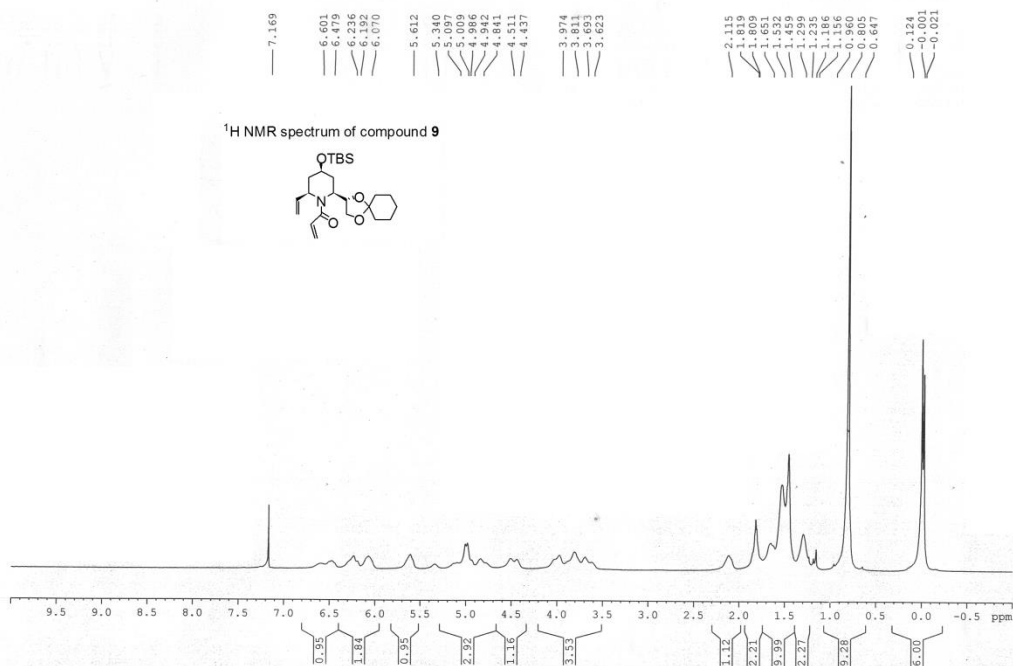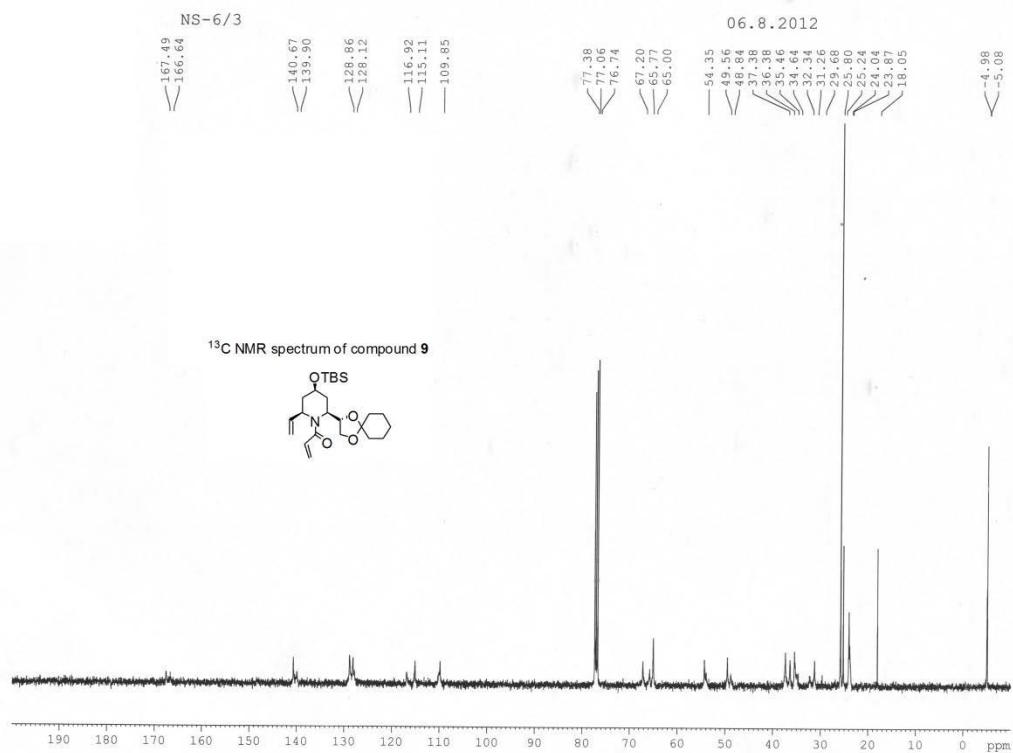

**<sup>1</sup>H NMR spectrum of compound 9  
in DMSO-d<sub>6</sub>, at 70 C**

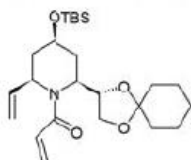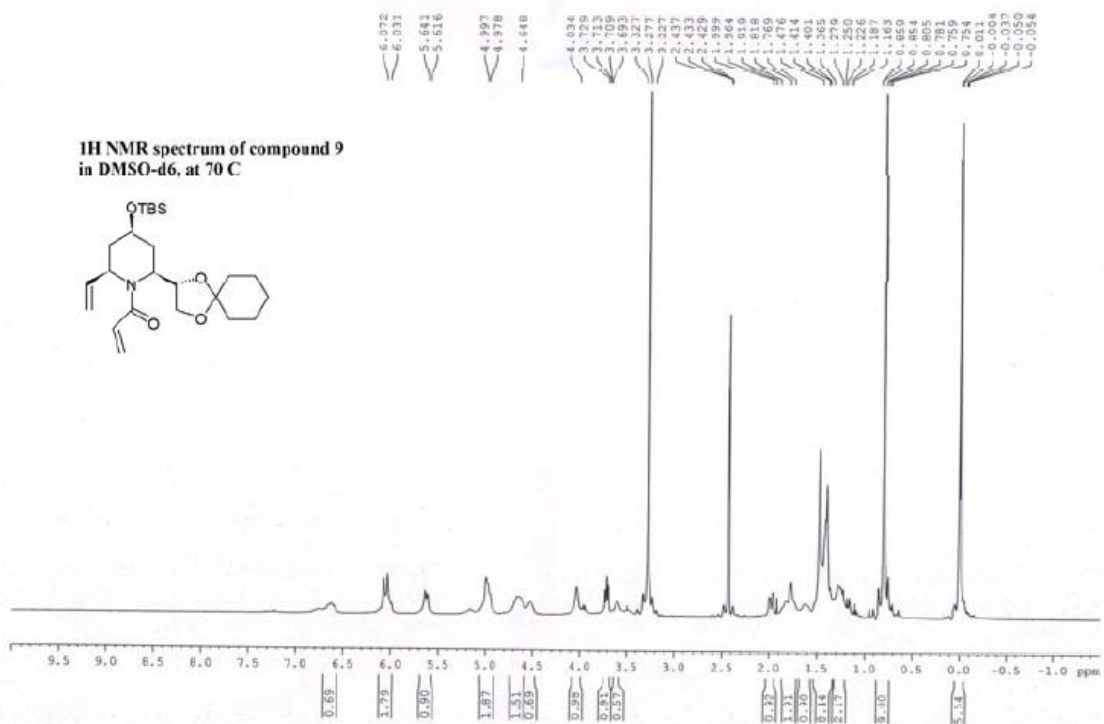

NS1a

**<sup>13</sup>C NMR spectrum of compound 9  
in DMSO-d<sub>6</sub> at 70 C**

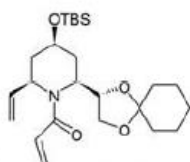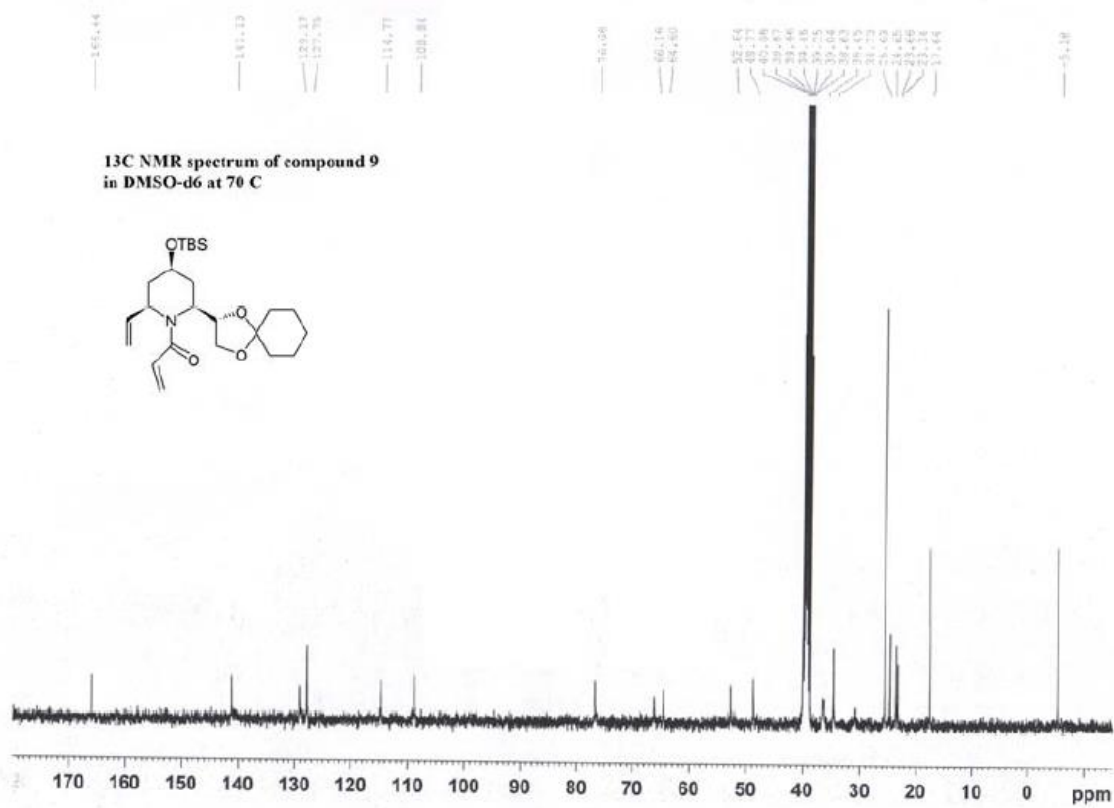

ns-6-4

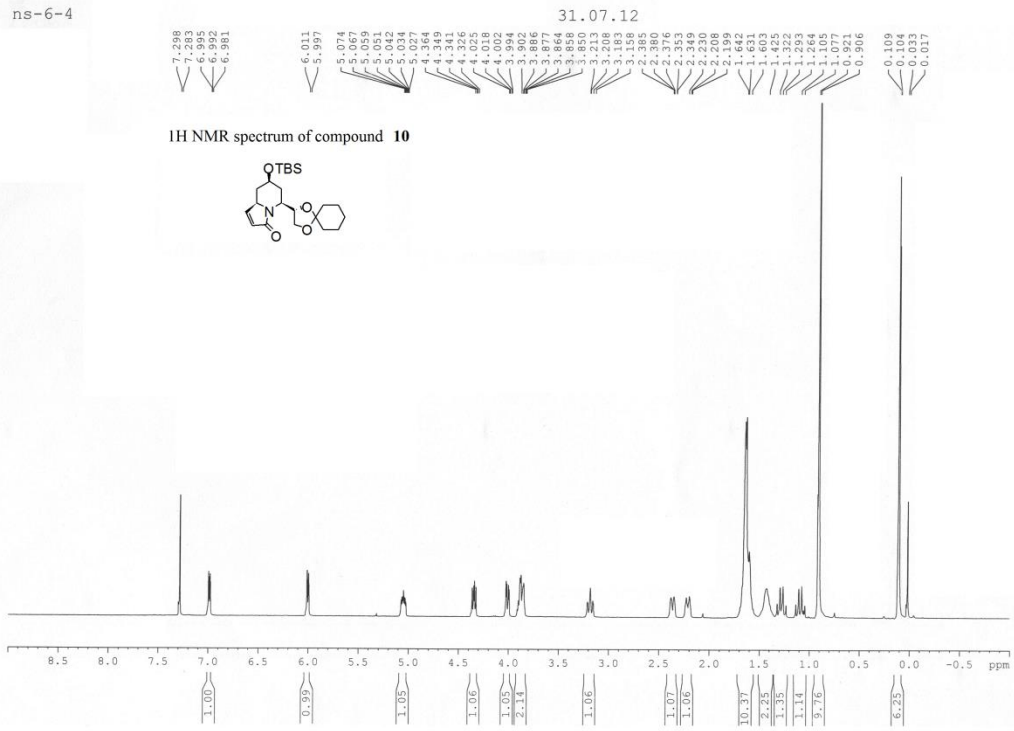

NS-6-4

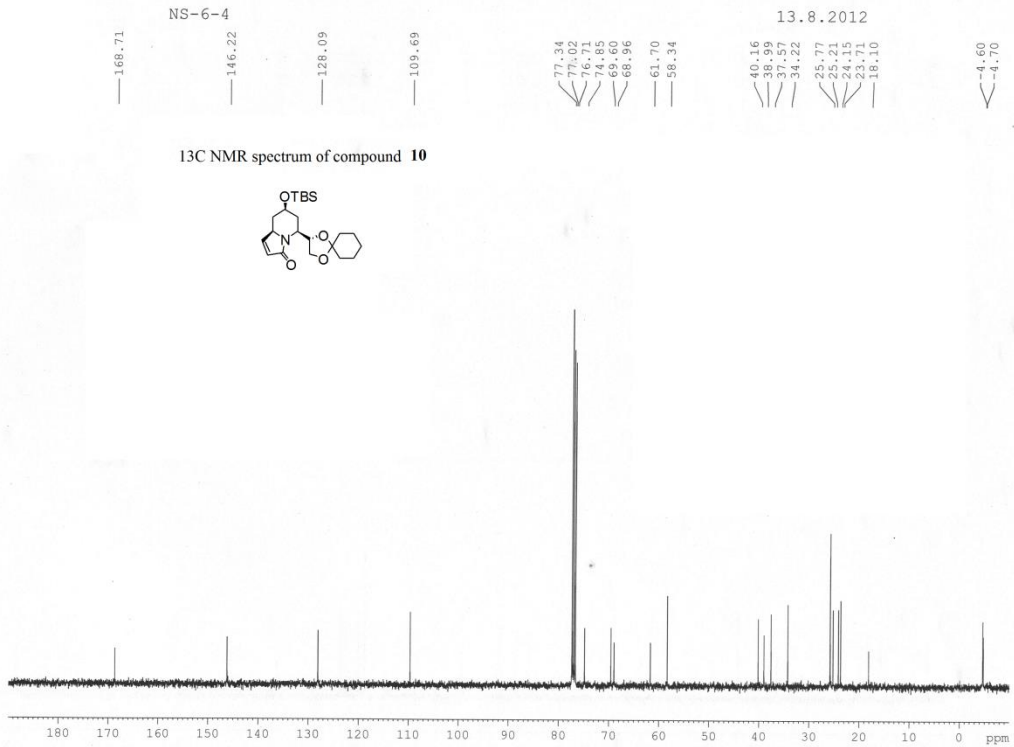

NS-Q-BU

12.11.2013

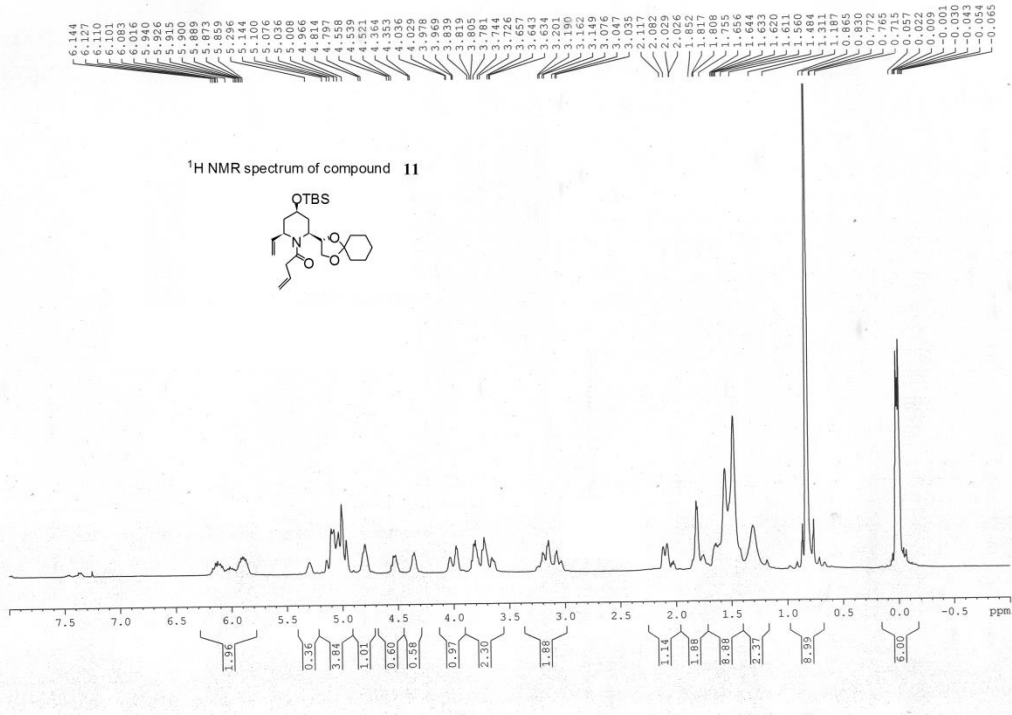

NS-Q-BU

12.11.2013

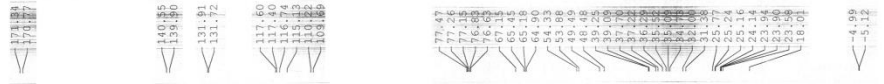

<sup>13</sup>C NMR spectrum of compound 11

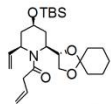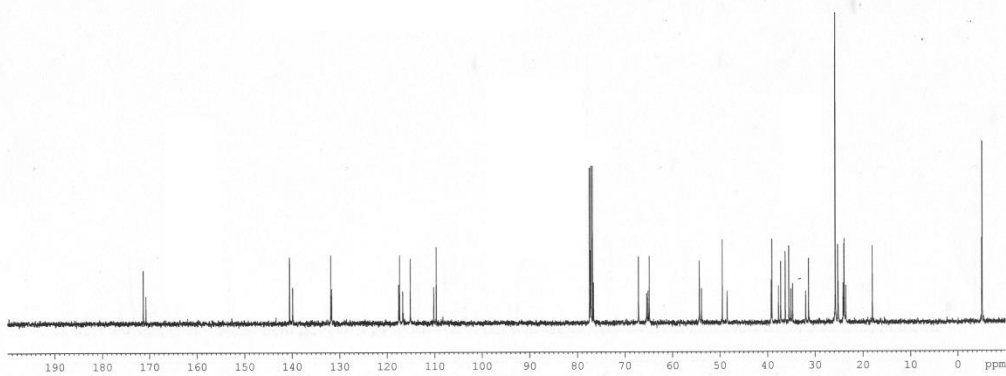

**<sup>1</sup>H NMR spectrum of compound 11  
in DMSO-d6 at 70 C**

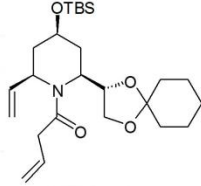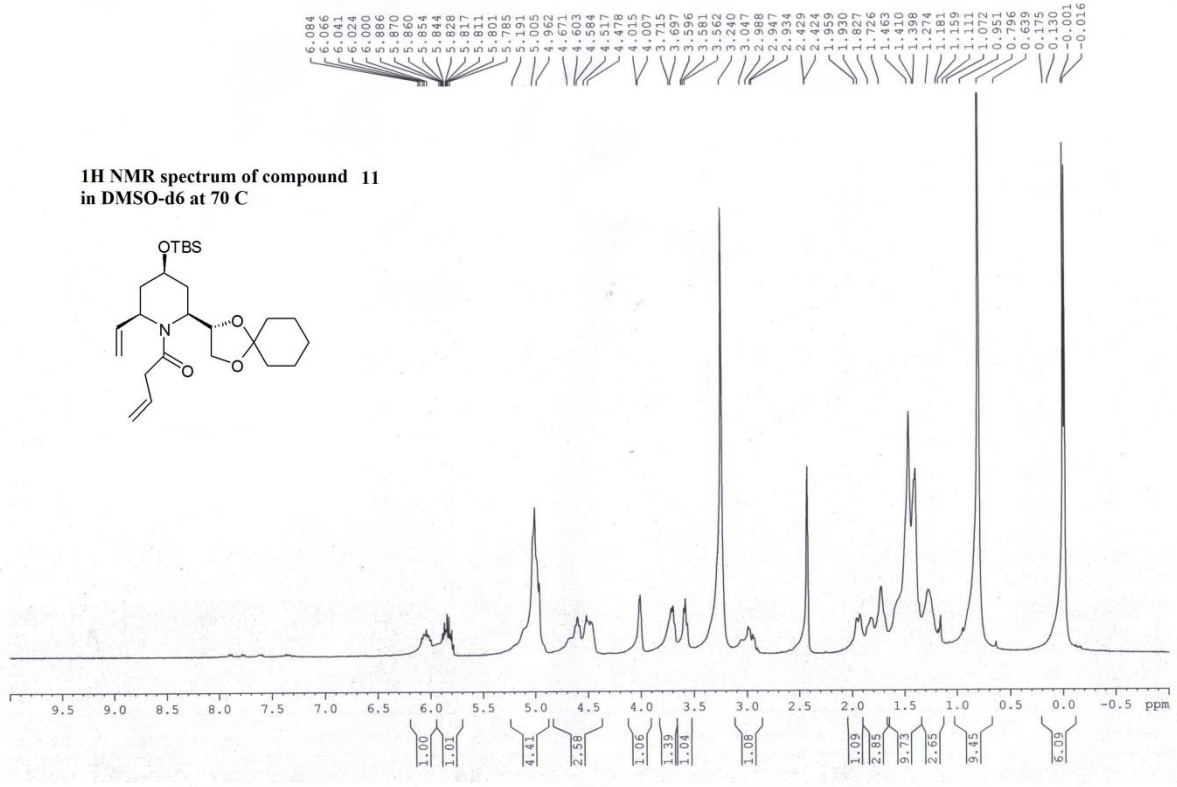

NSQB

**<sup>13</sup>C NMR spectrum of compound 11  
DMSO-d6 at 70 C**

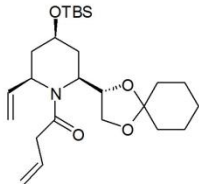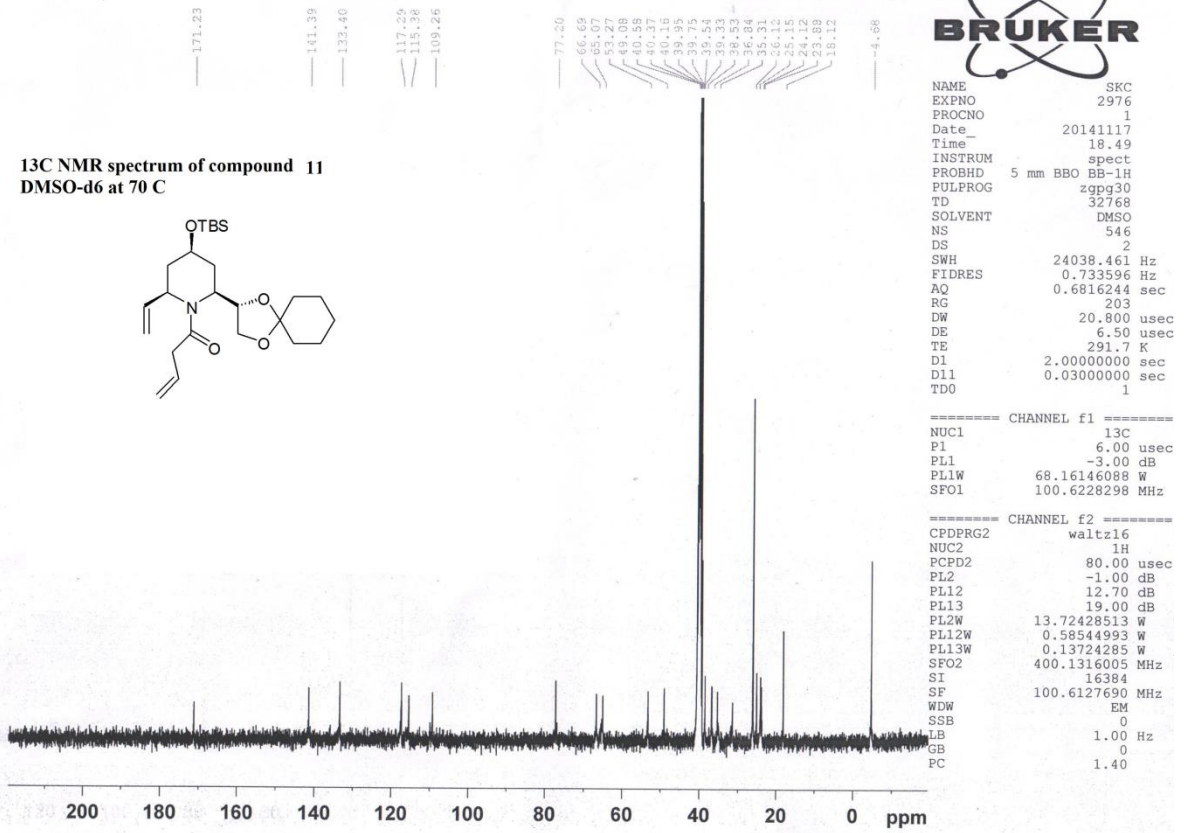

NS-Quin

20.11.2013

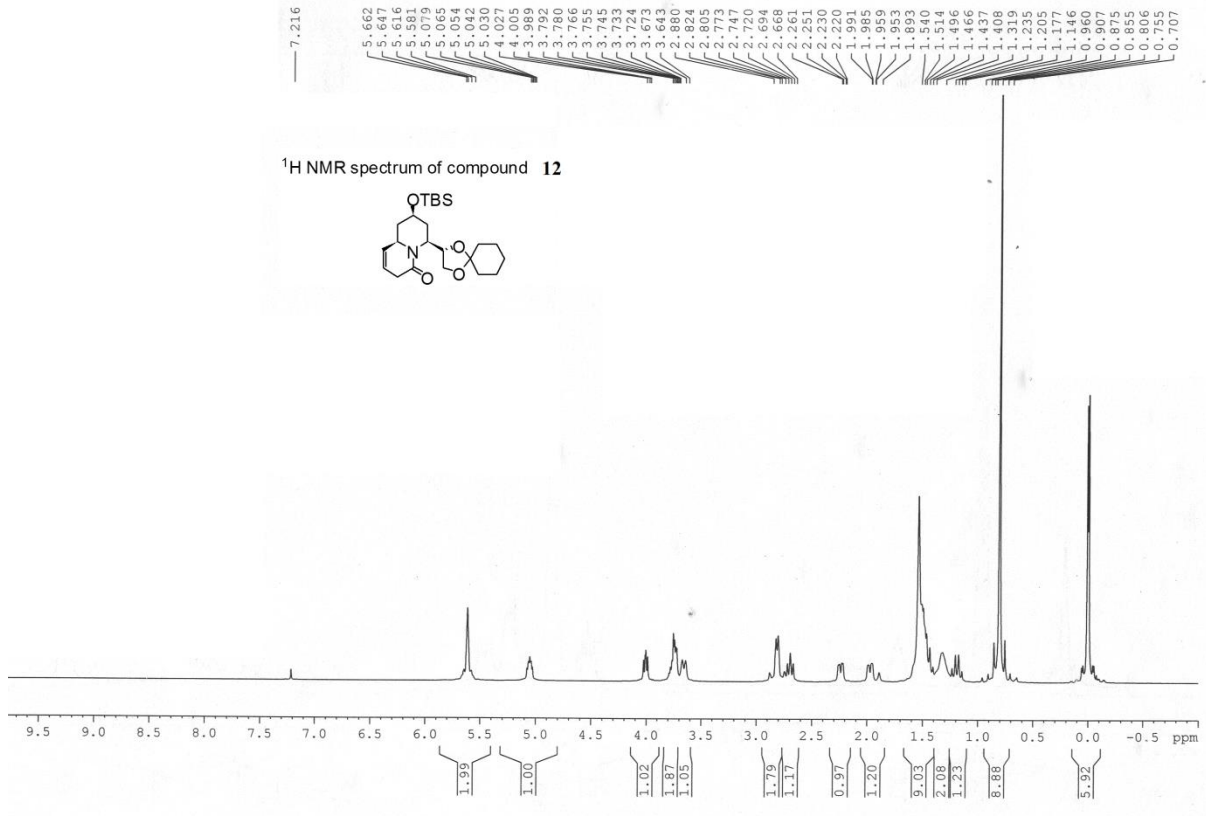

NS-Quin

20.11.2013

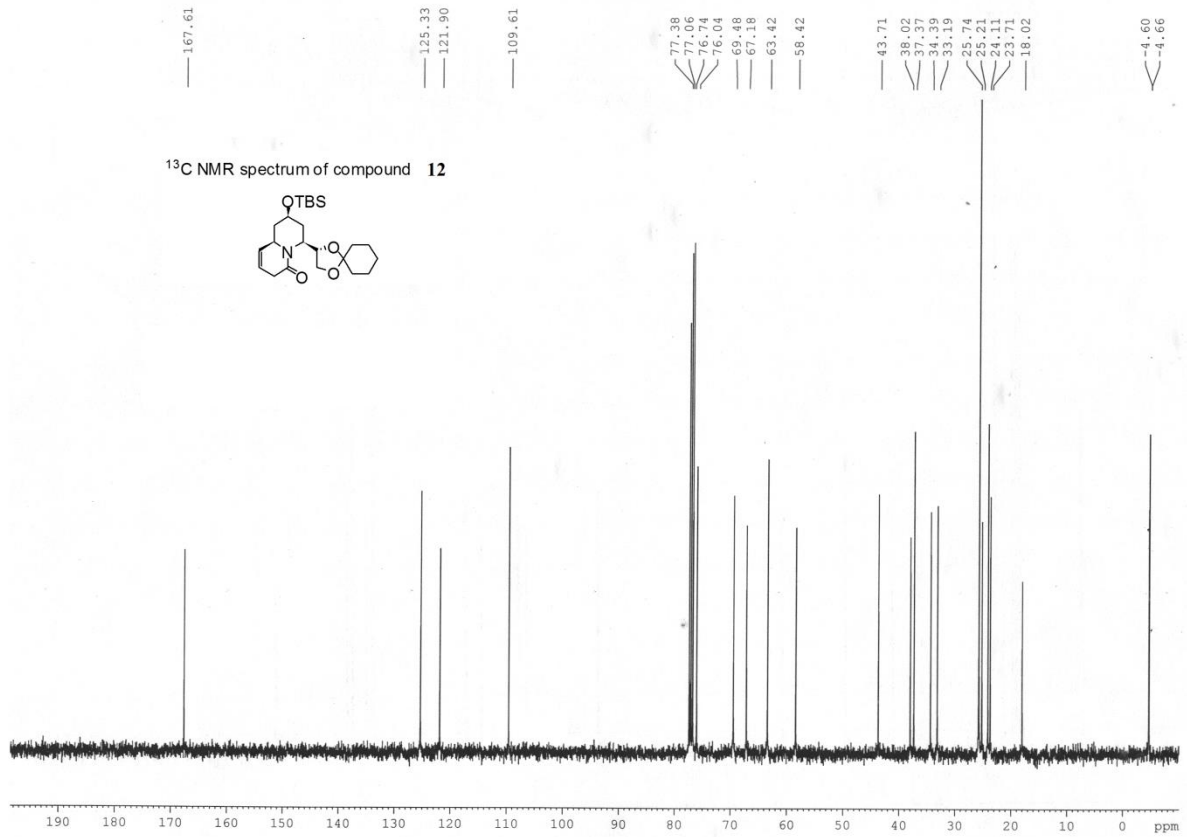

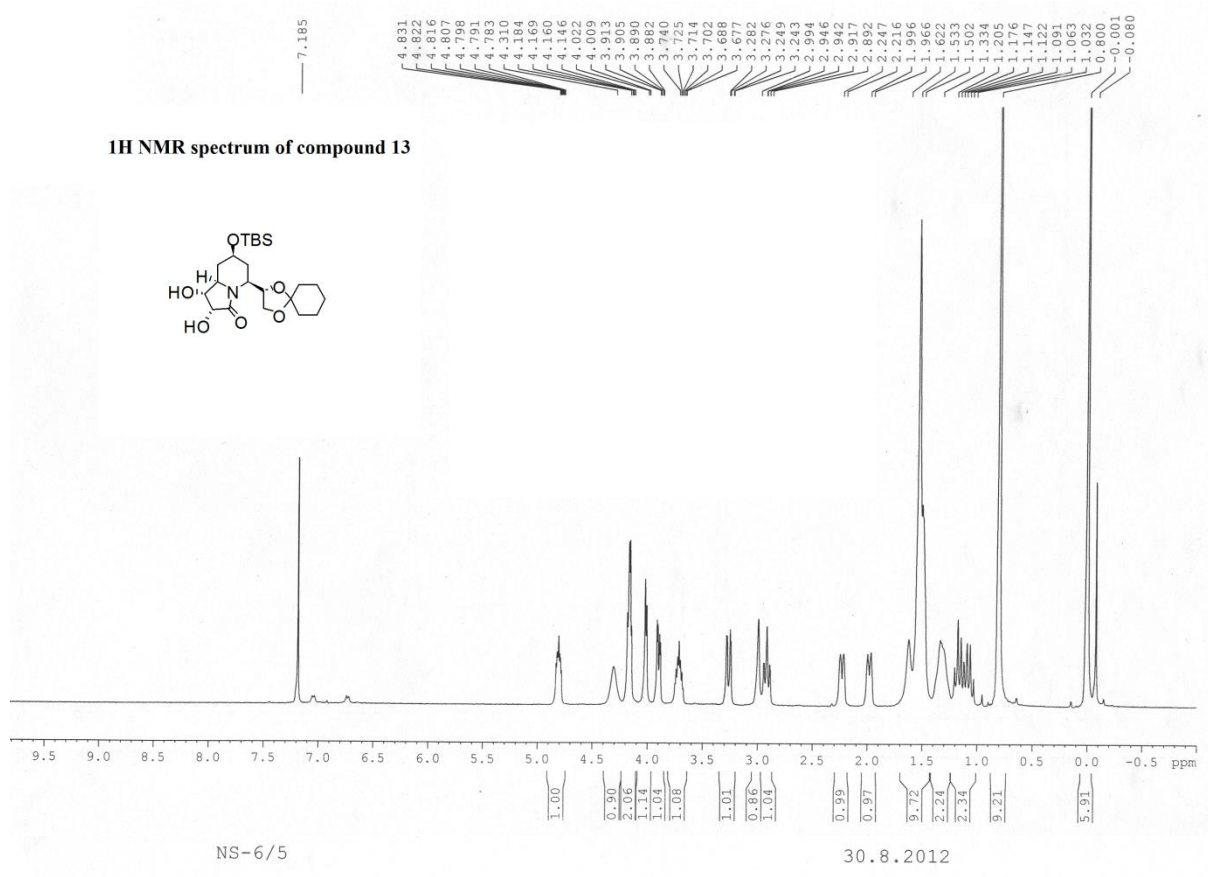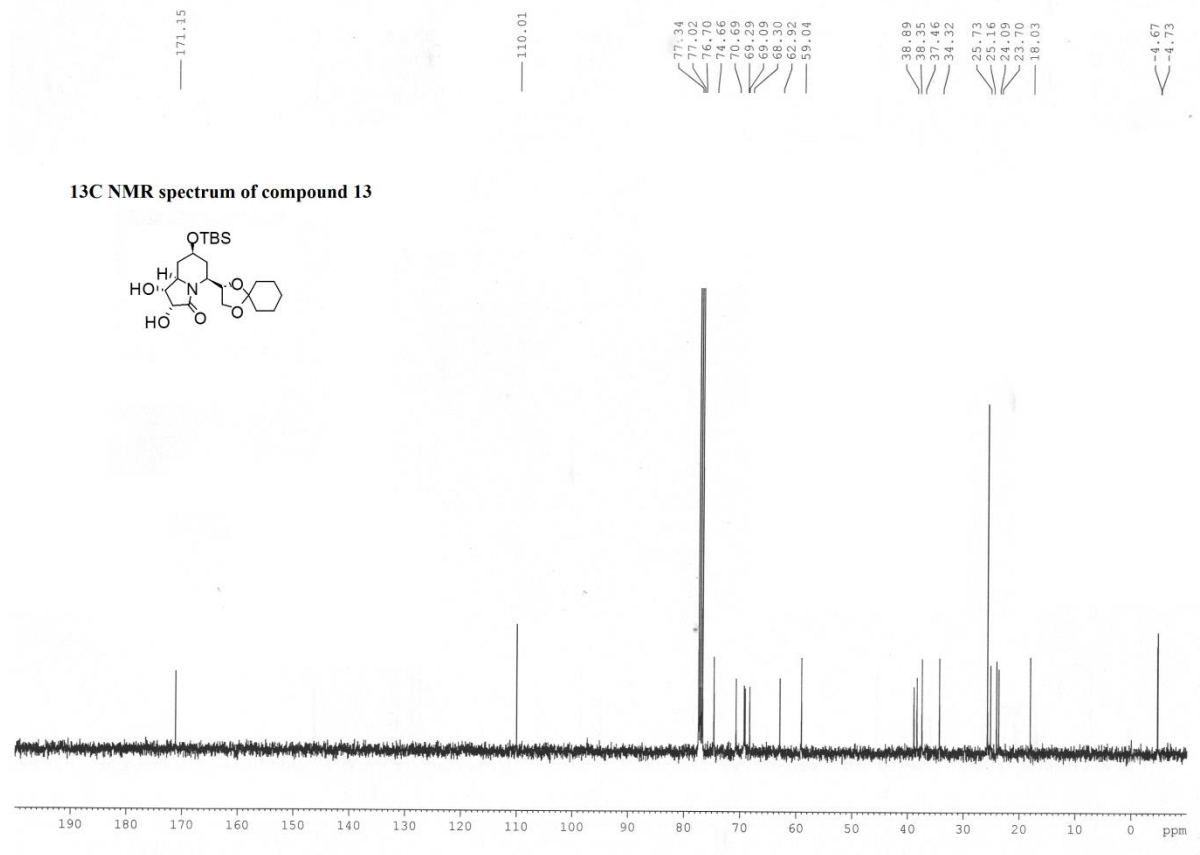



NS-6-7A

17.8.2012

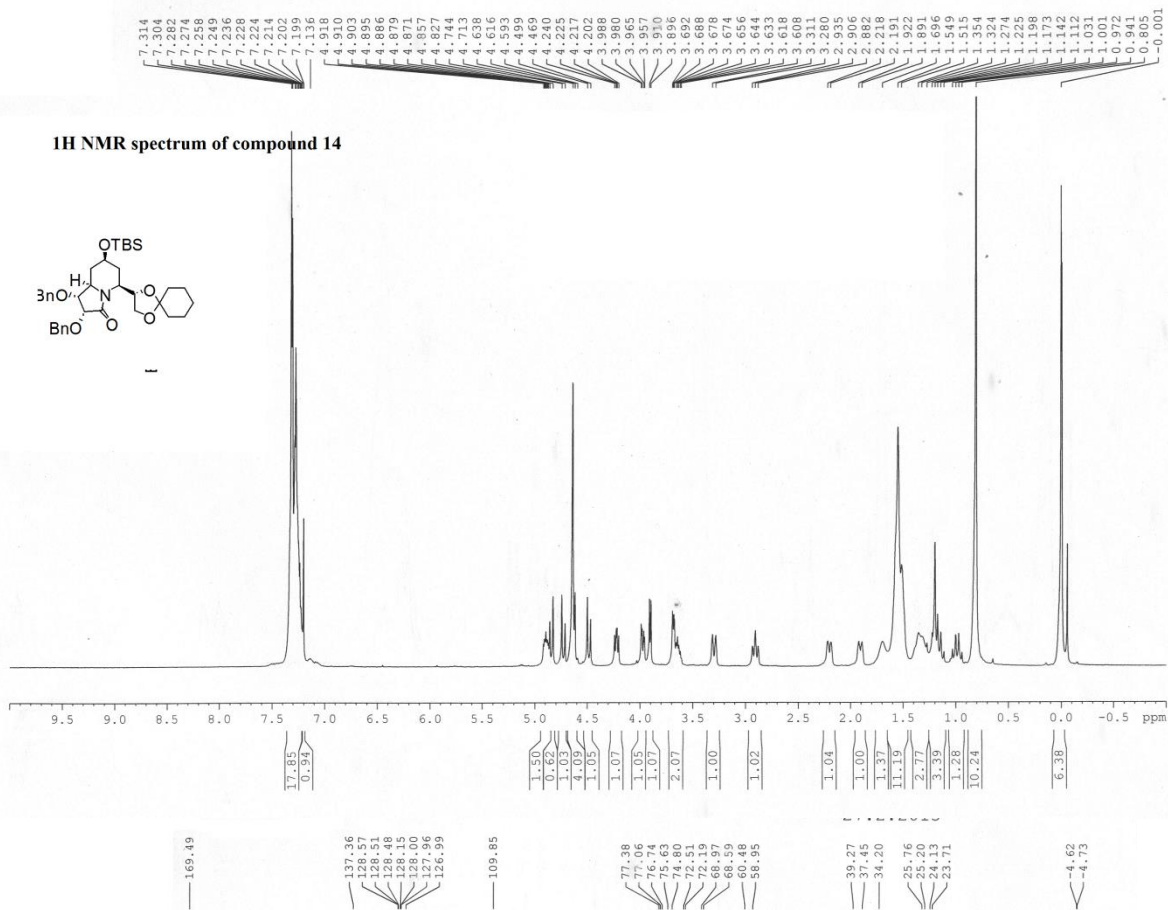**<sup>13</sup>C NMR spectrum of compound 14**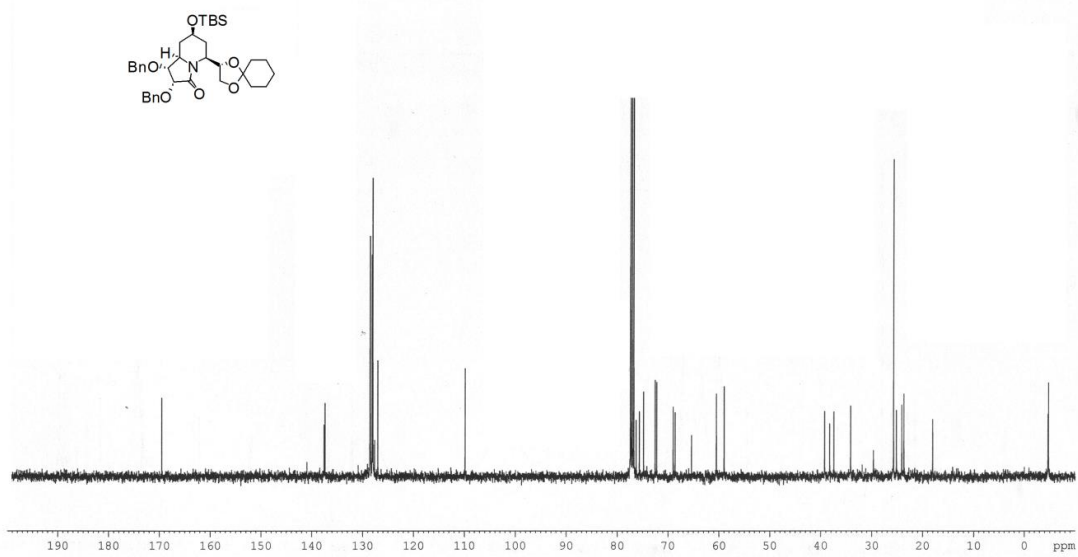

<sup>1</sup>H NMR spectrum of compound **15**

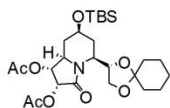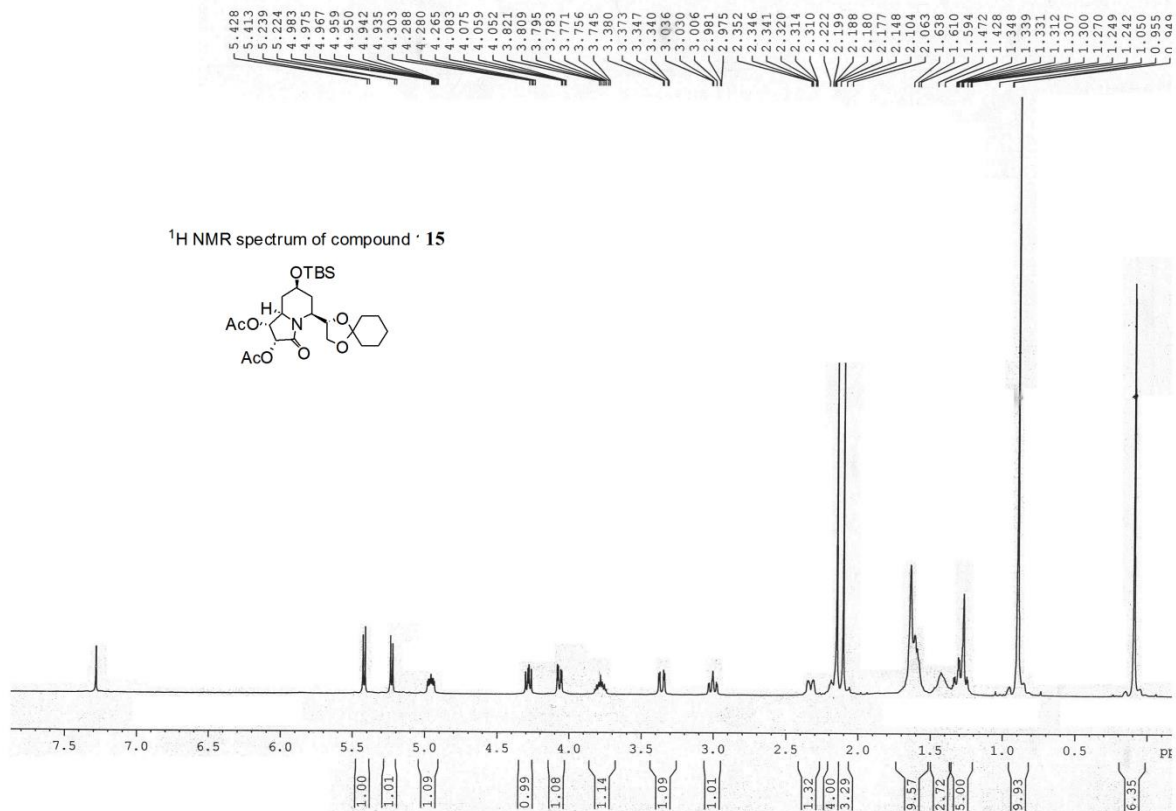

169.999  
169.623  
166.299

110.107

77.339  
77.021  
76.782  
69.999  
69.115  
68.762  
68.183  
60.764  
59.112

38.607  
38.257  
37.619  
34.200  
25.704  
25.151  
24.134  
23.667  
20.647  
20.354  
17.990

4.643  
4.686

<sup>13</sup>C NMR spectrum of compound **15**

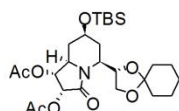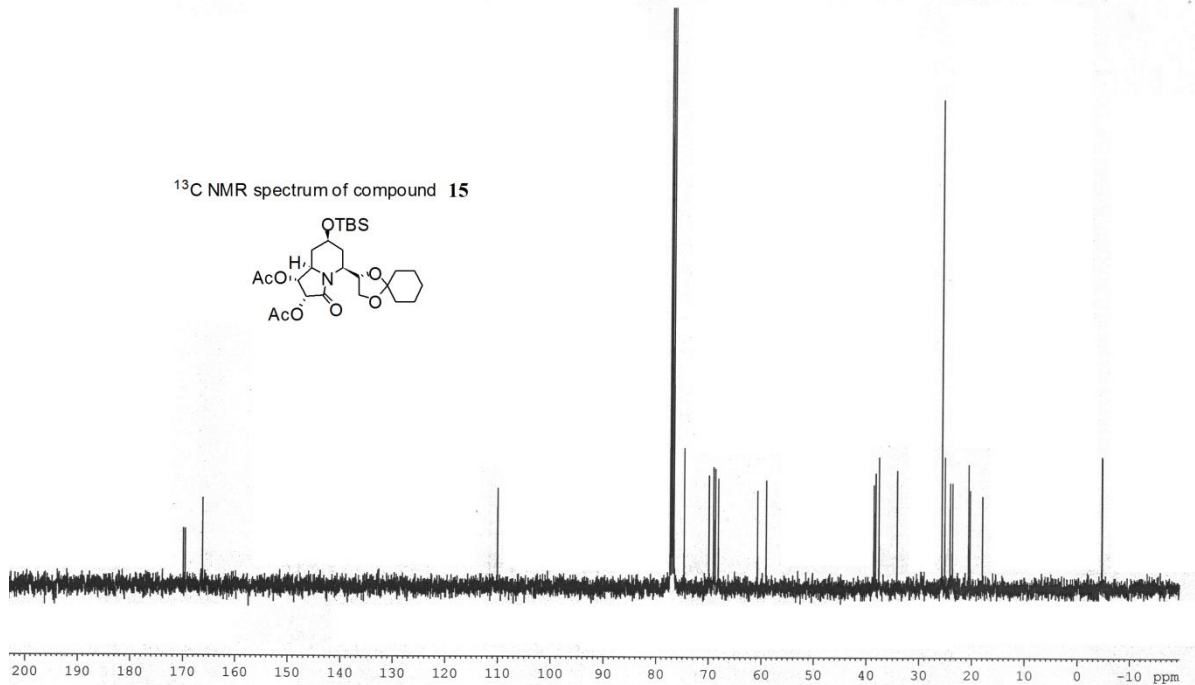

**<sup>1</sup>H-<sup>1</sup>H COSY spectrum  
of compound 15**

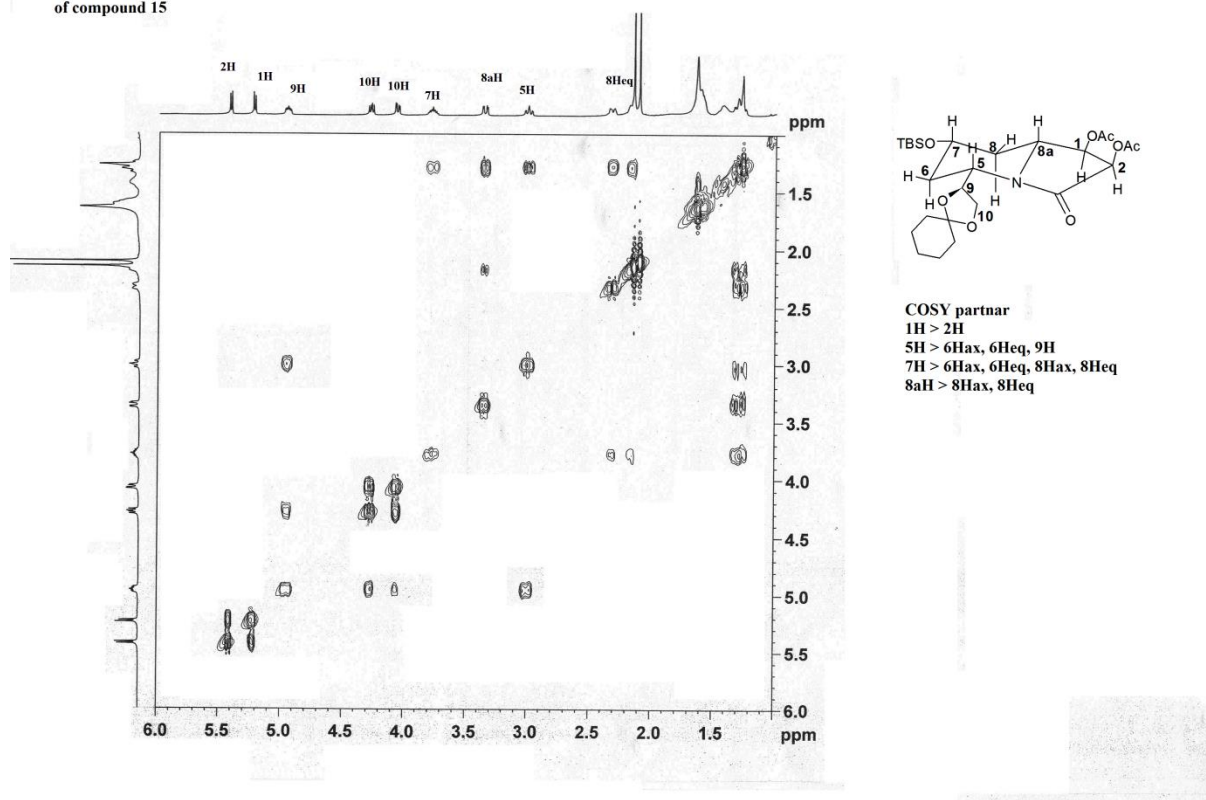

**HSQC spectrum of compound 15**

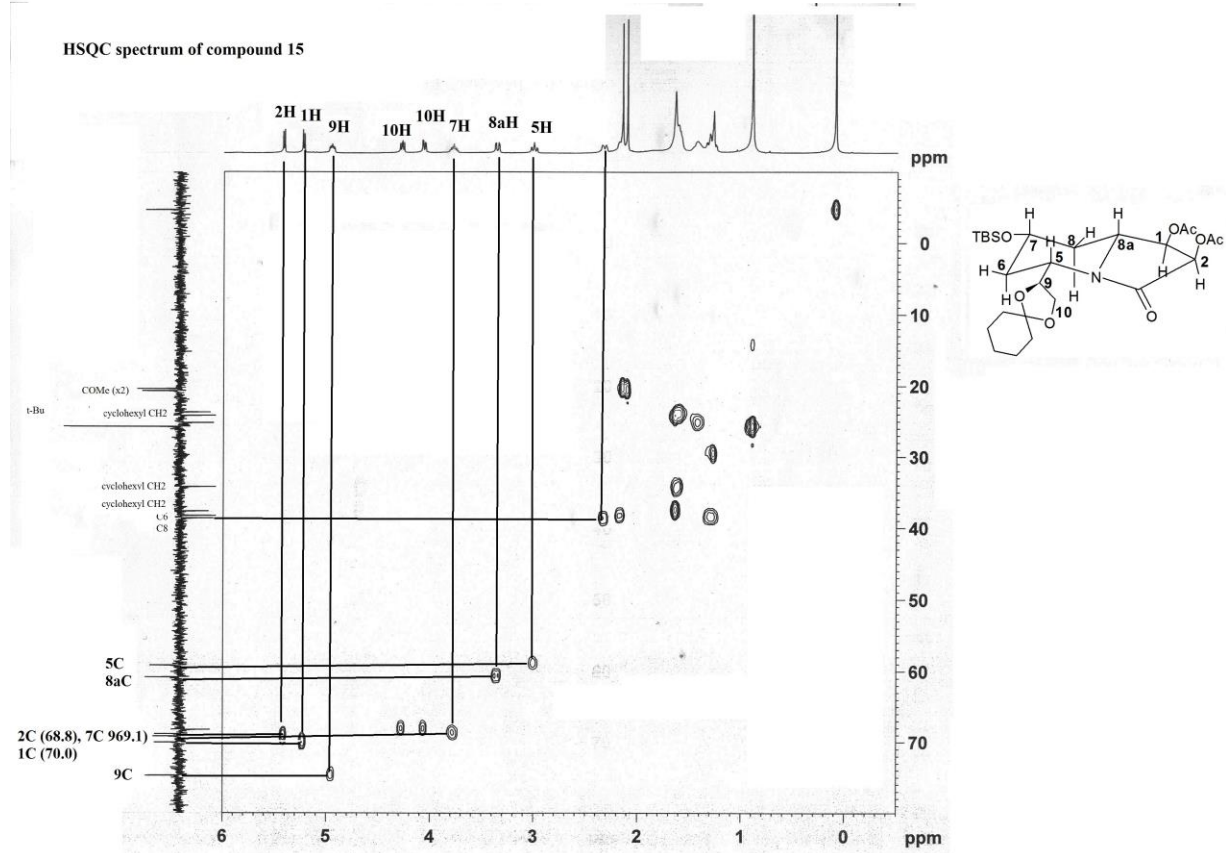



NS-triol

01.3.2013

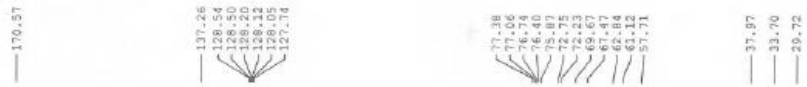

<sup>13</sup>C NMR spectrum of compound 16

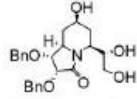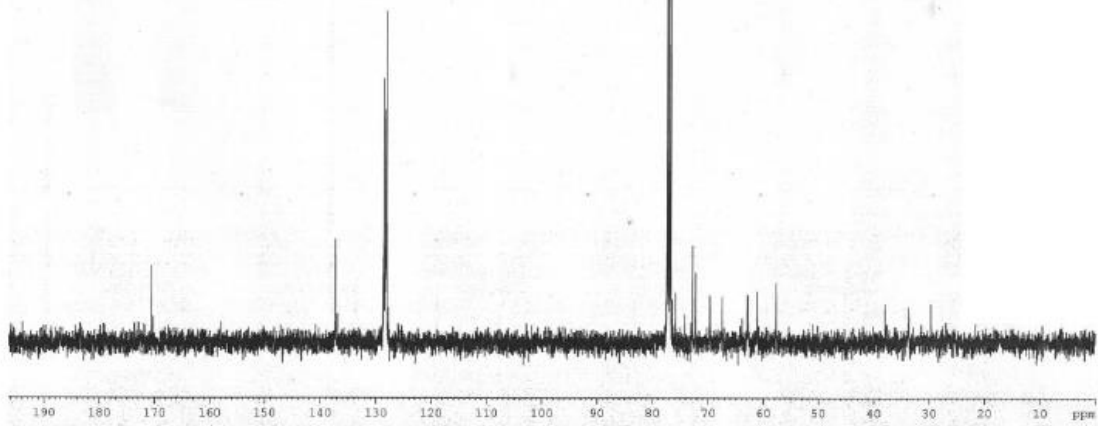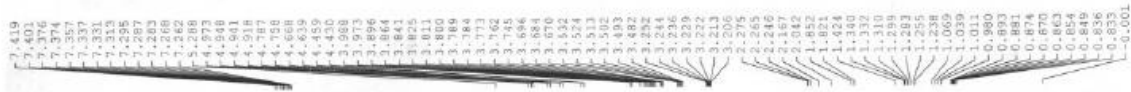

<sup>1</sup>H NMR spectrum of compound 17

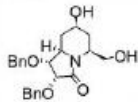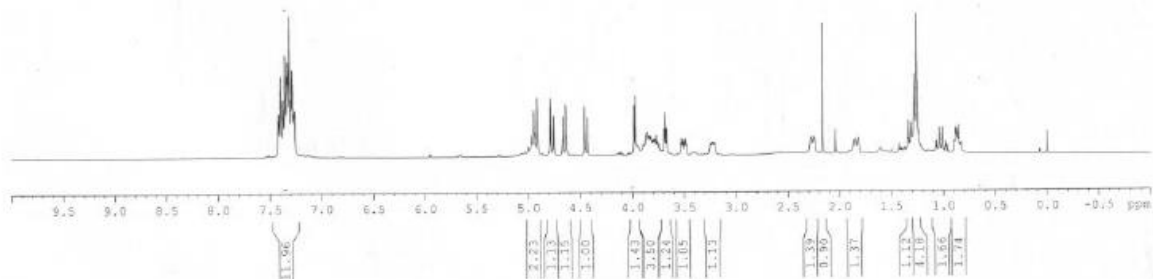

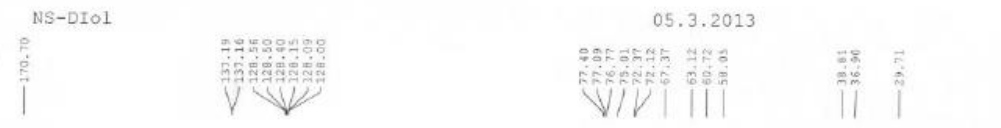

<sup>13</sup>C NMR spectrum of compound 17

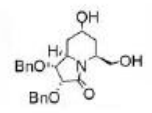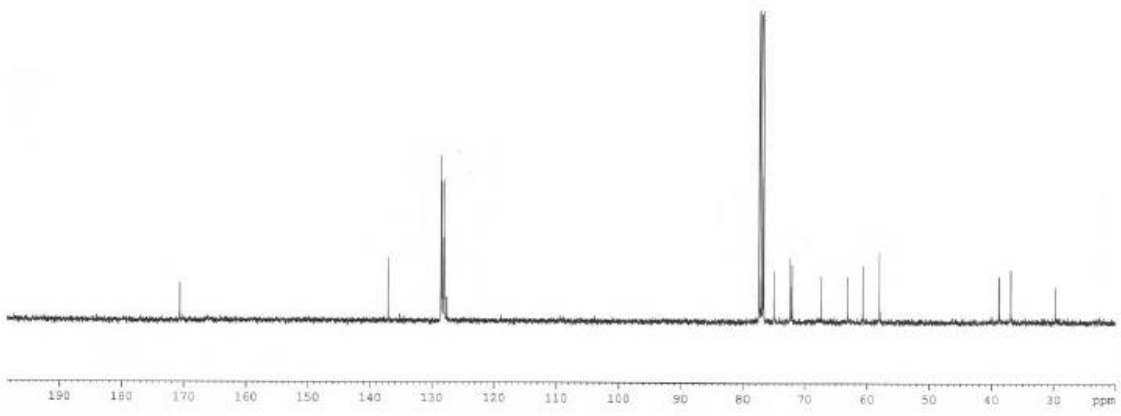

NS-6/10A

29.8.2012

<sup>1</sup>H NMR spectrum of compound 18

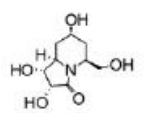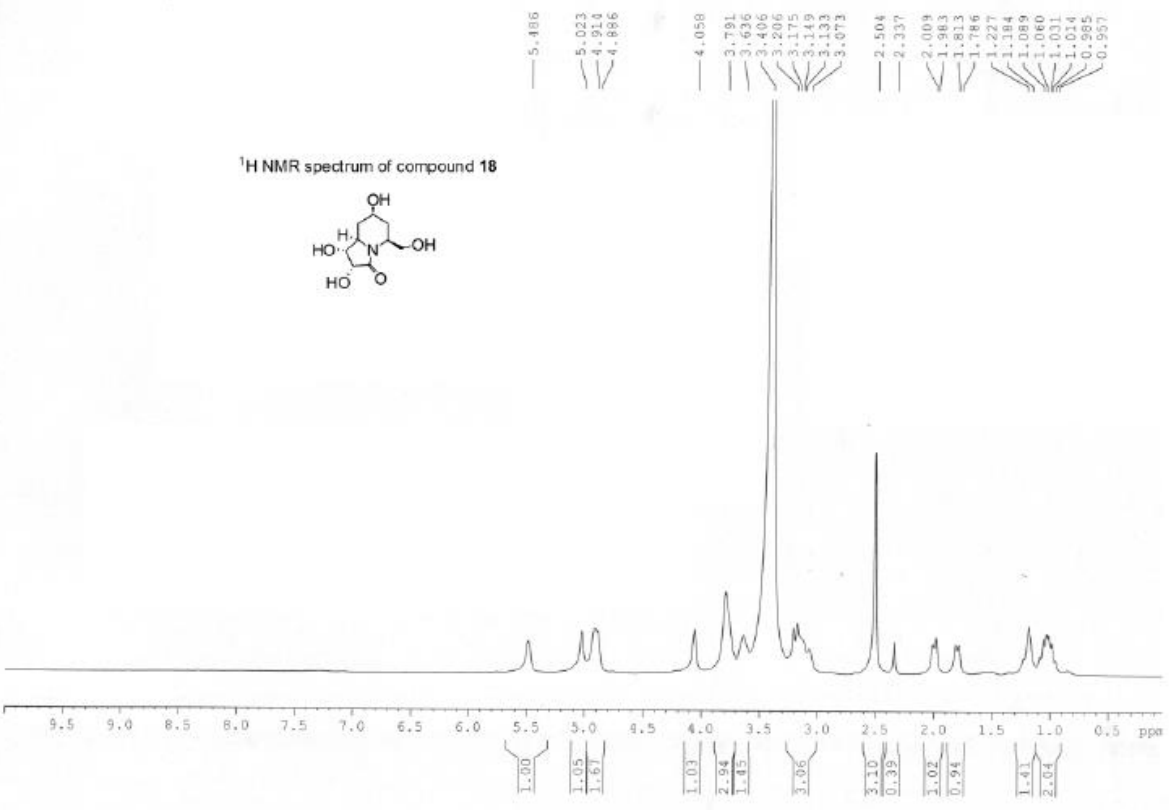

NS-6/10A

30.08.12

172.50

71.16  
70.07  
67.03  
63.08  
62.22  
57.74

40.56  
40.32  
40.22  
39.91  
39.72  
39.51  
39.31  
38.79  
37.72

<sup>13</sup>C NMR spectrum of compound 18

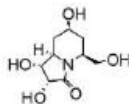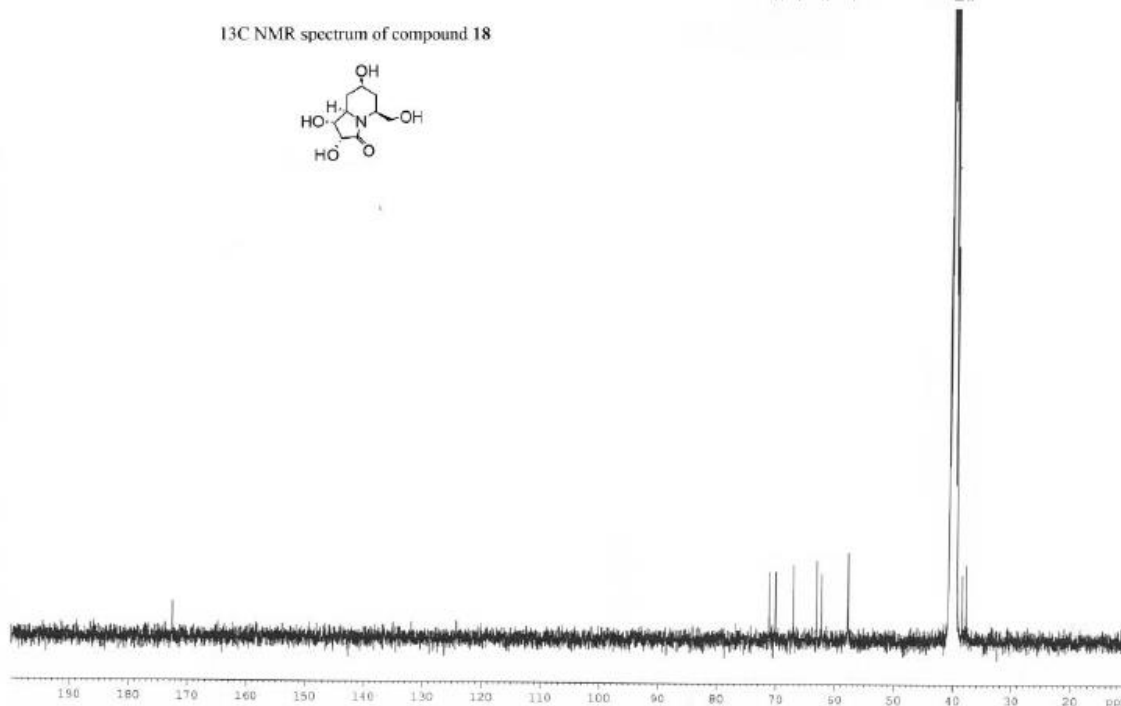

PK2-NS-6-5-SKS

PK2-NS-6-5 19 (0.368) Sm (Mn, 10x5.00); Cm (1:19)

TOF MS ES+  
164

HRMS spectrum of compound 18

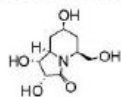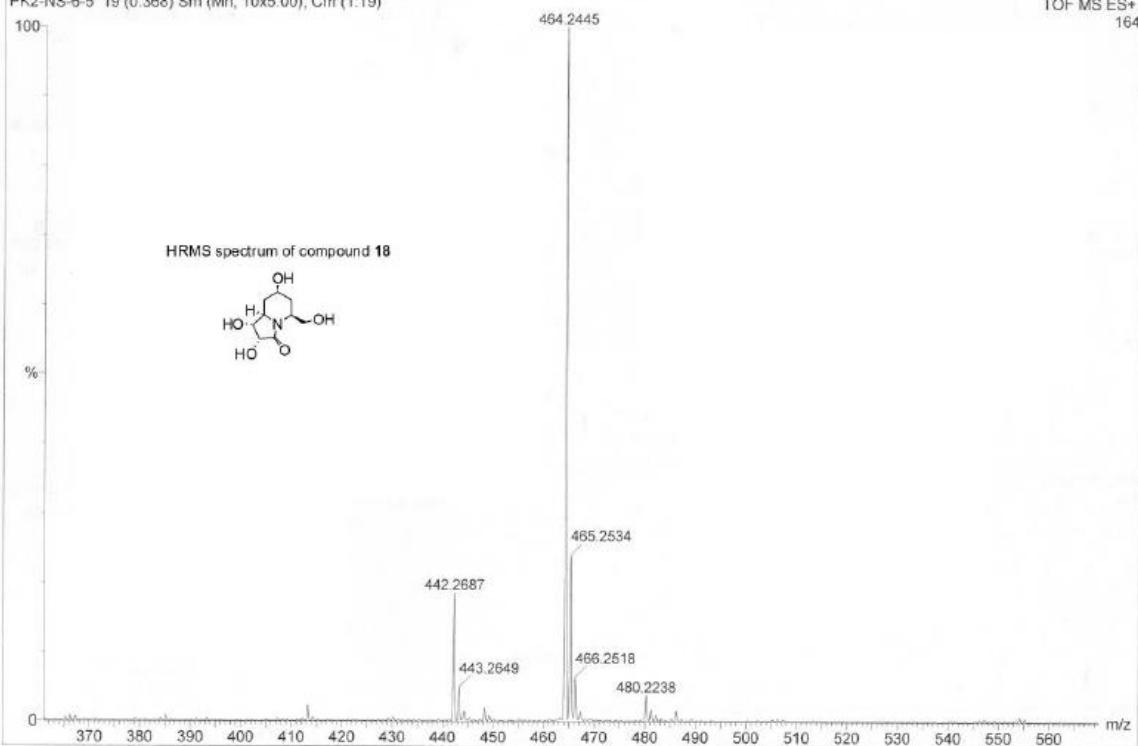





NS-Q-BENZ

08.7.2013

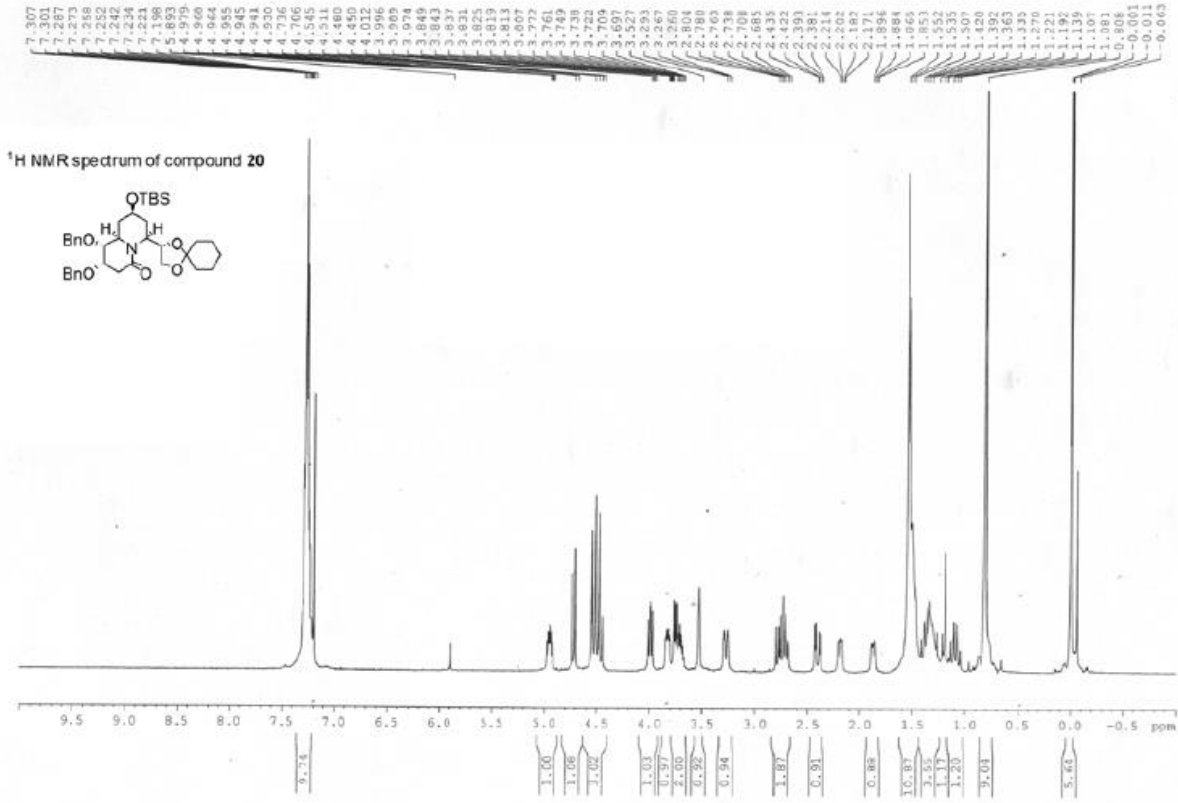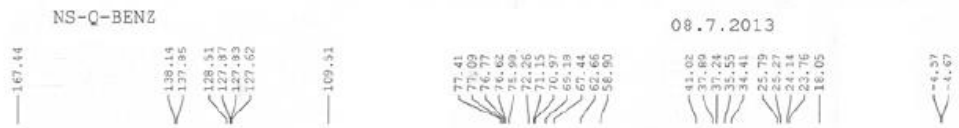

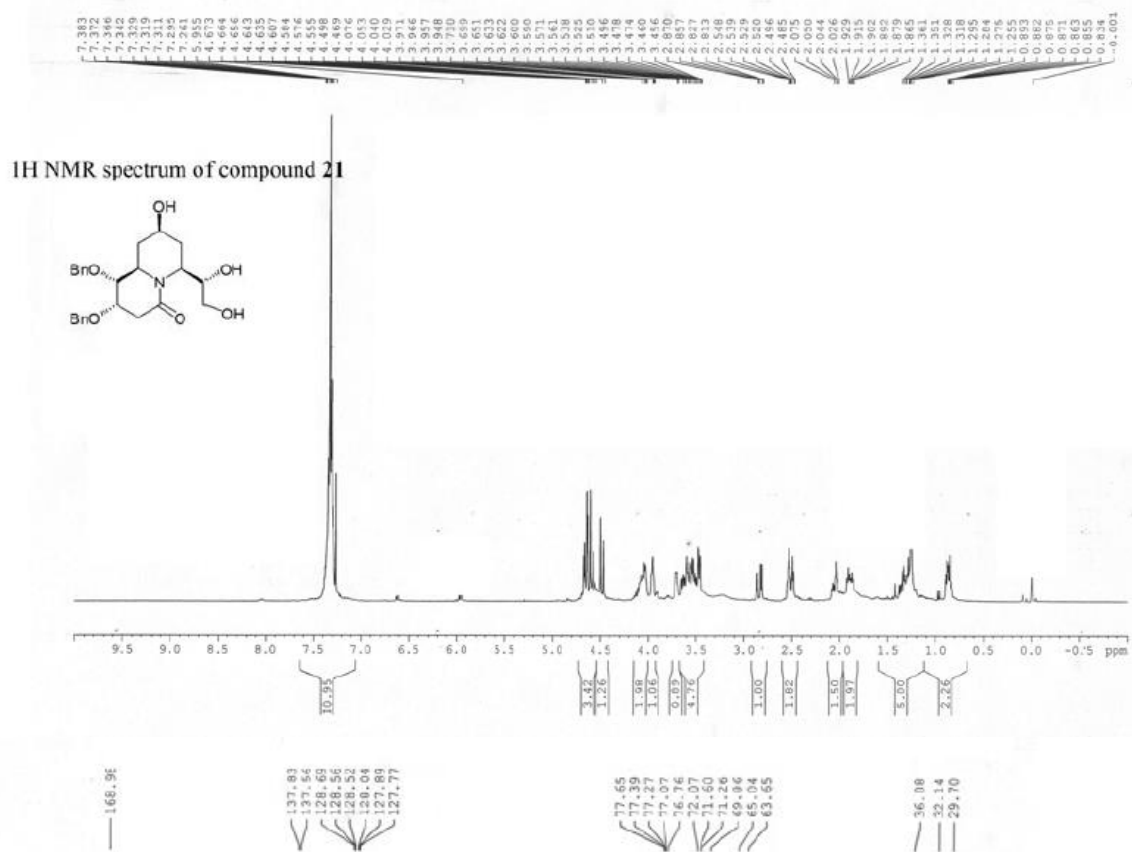

**<sup>13</sup>C NMR spectrum of compound 21**

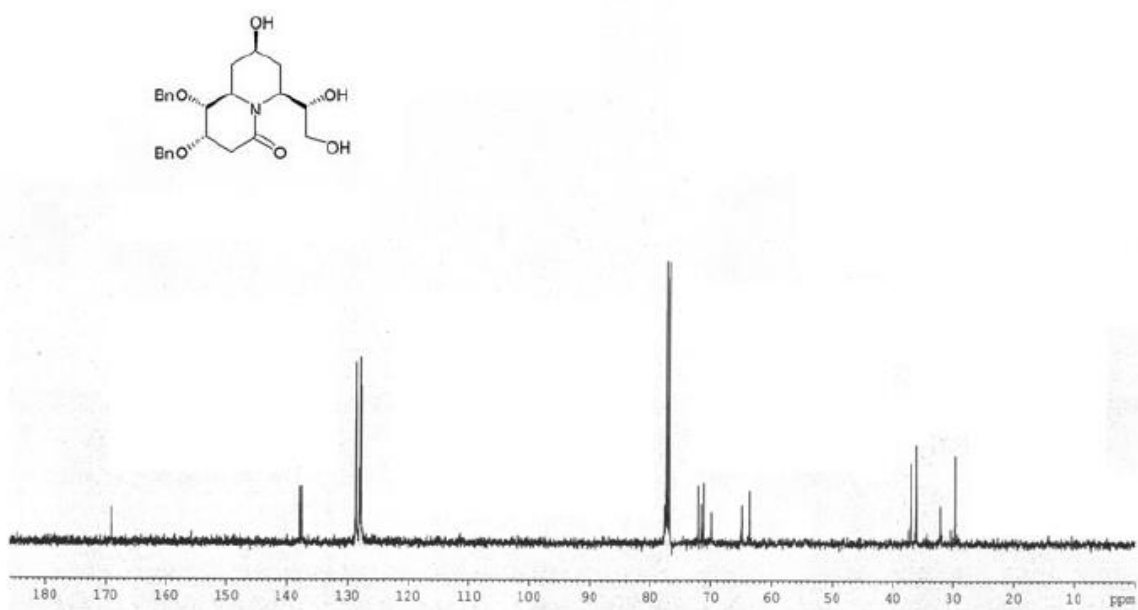

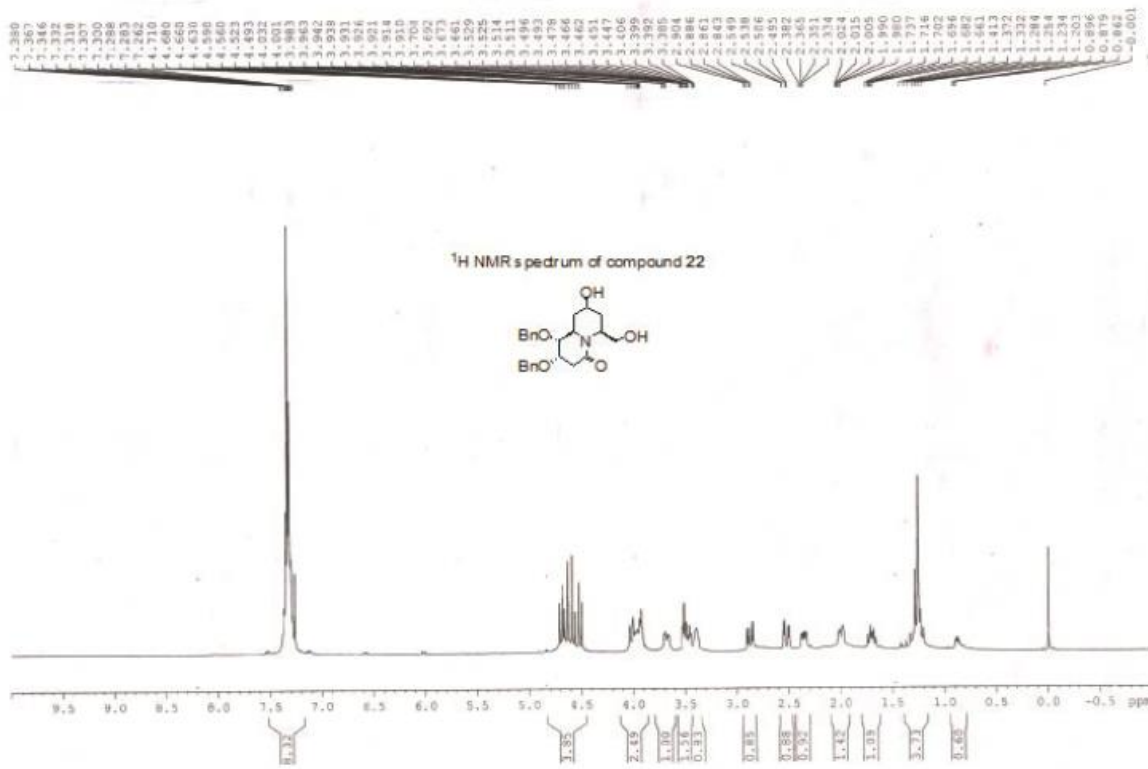

NS-Q-Diol

12.12.2013

166.31

137.83

137.63

128.55

128.04

127.90

127.74

77.48

77.17

76.85

72.14

71.17

69.98

69.01

63.45

58.90

56.13

38.48

35.85

35.76

30.20

29.72

<sup>13</sup>C NMR spectrum of compound 22

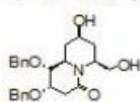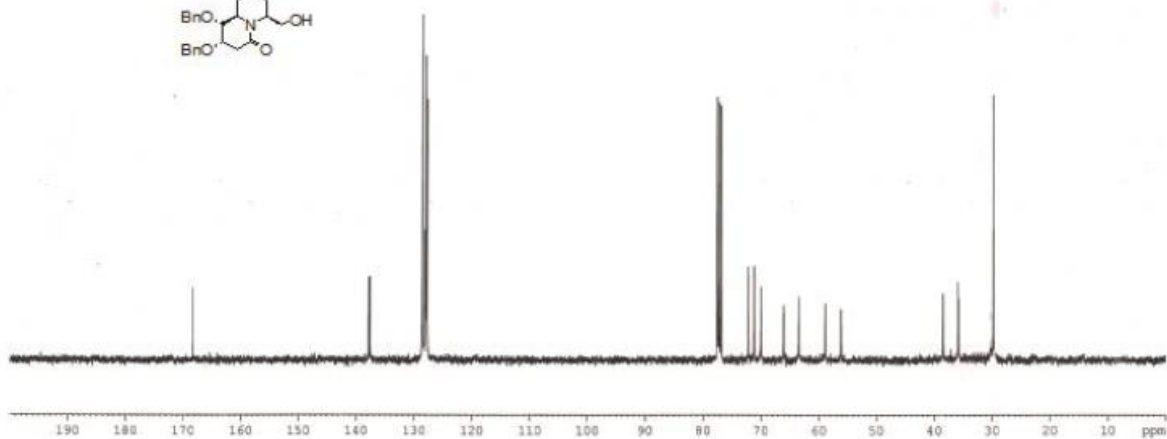

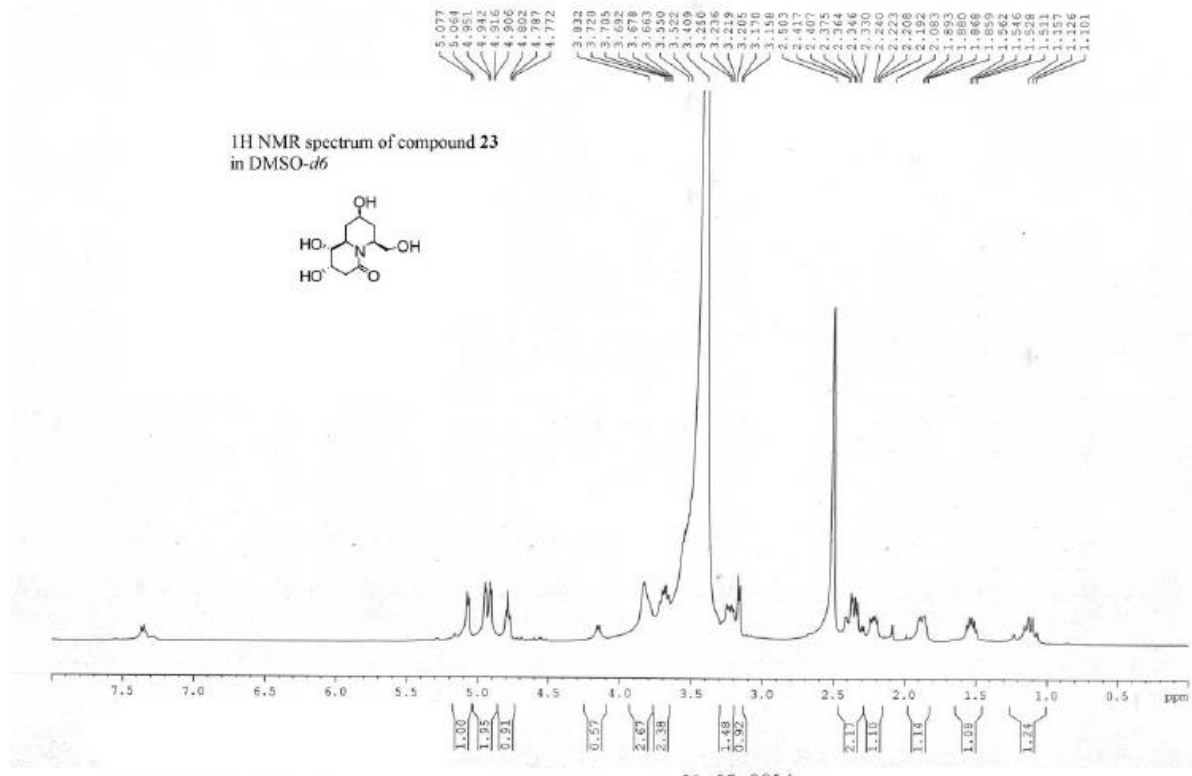

21.03.2014

NS-Q-TET-OL

13C NMR spectrum of compound 23 in DMSO-d6

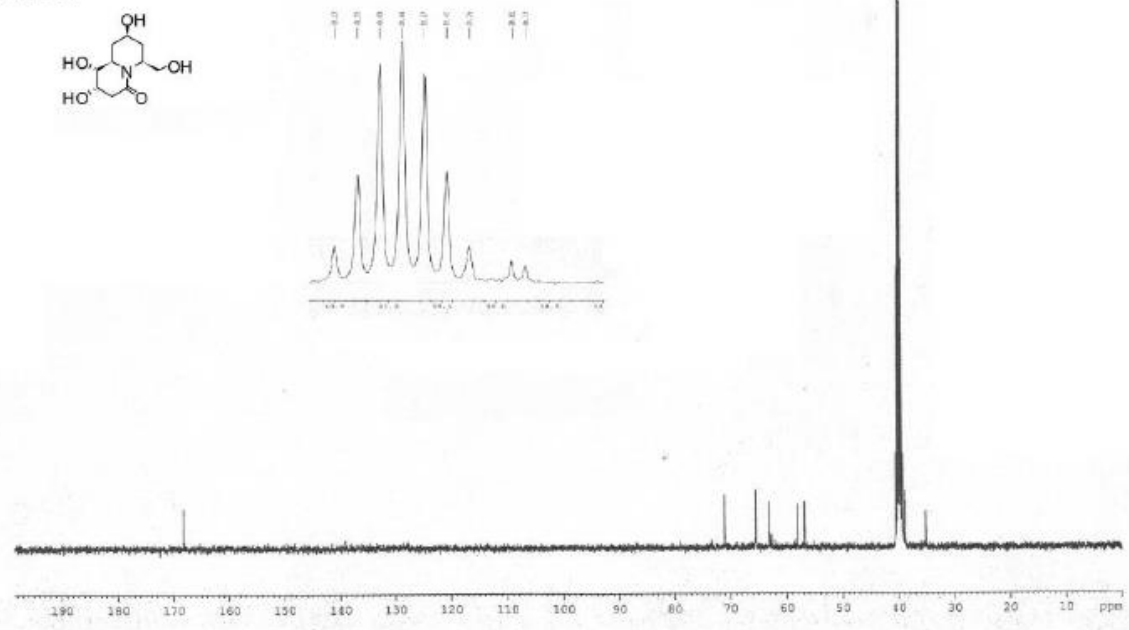

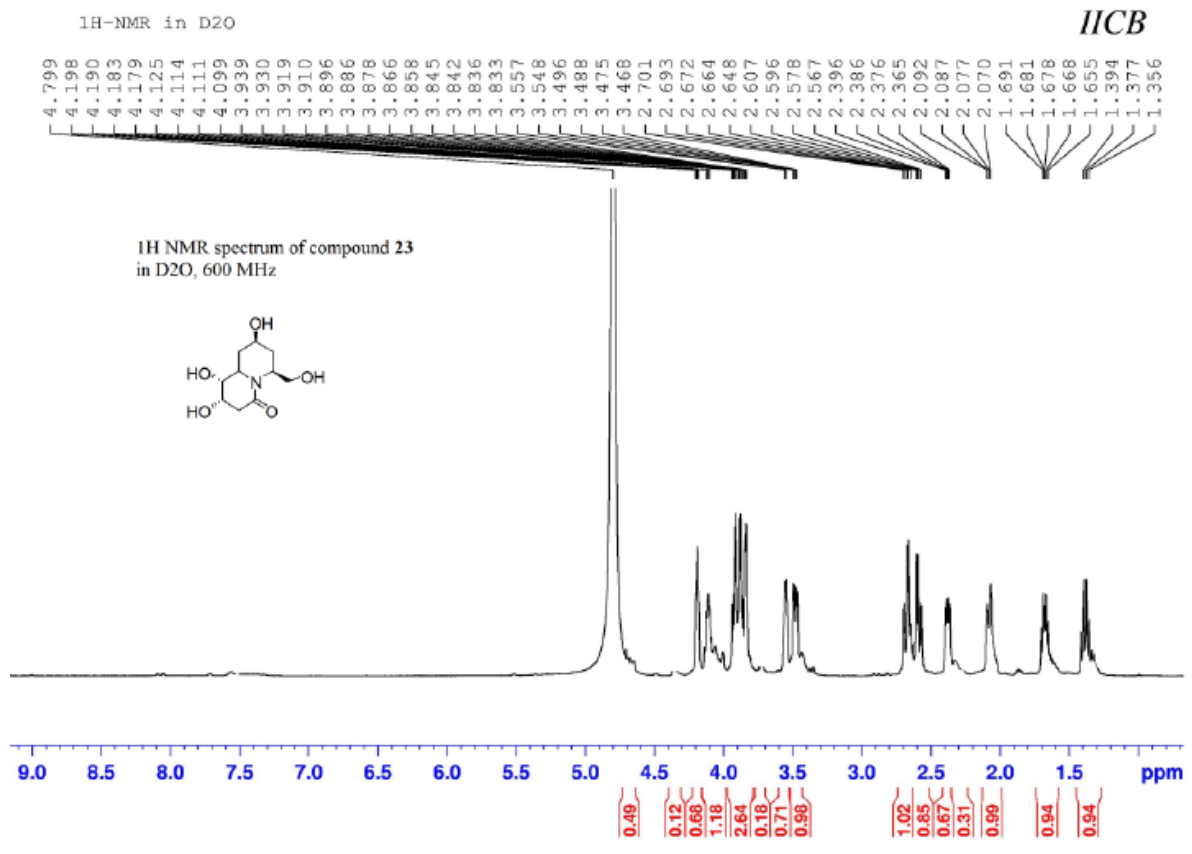

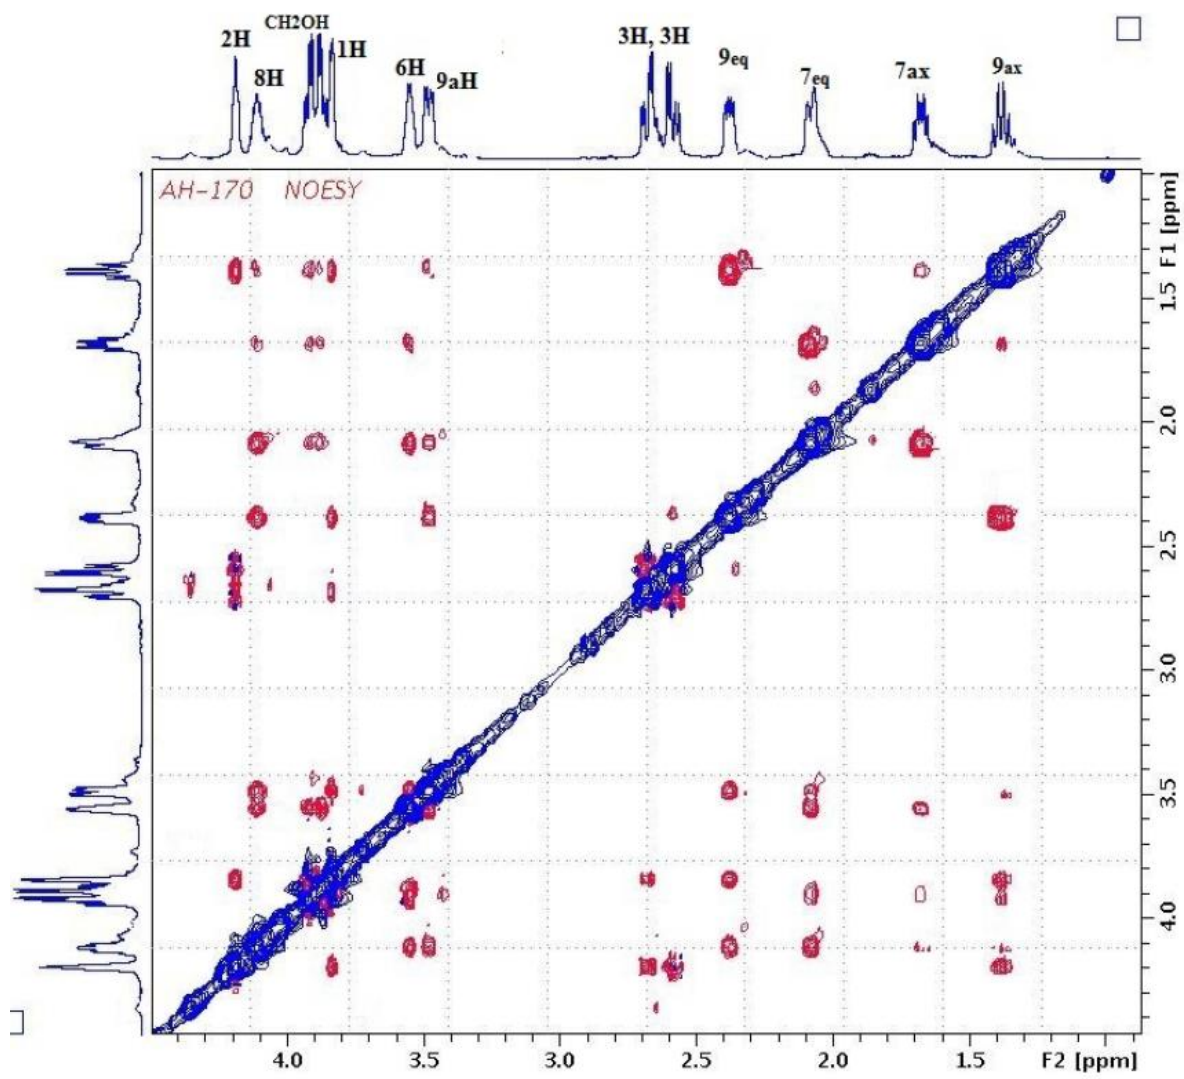

**nOe correlations**

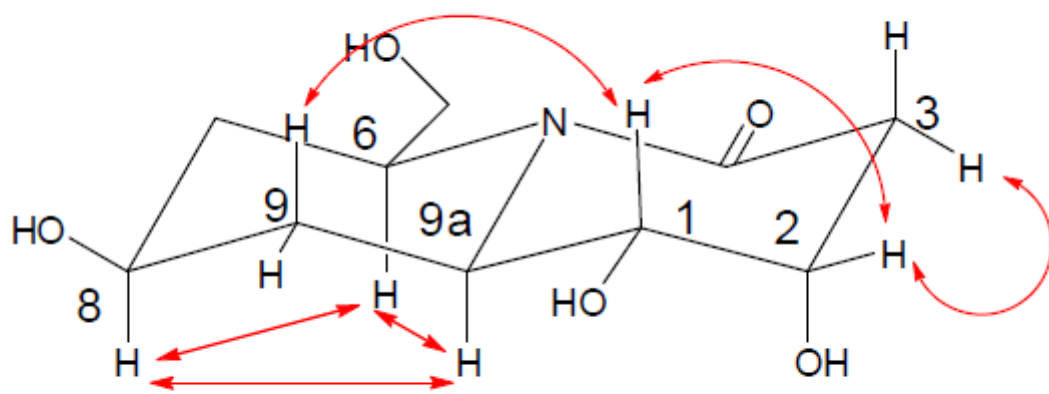

**23**
